# Supplementary material for: Turn-folding in fluorescent anthracene-substituted cyclopenta[d]isoxazoline short peptides
Source: Royal Society of Chemistry journal article supplement (doi:10.1039/d1ra03685h), 2021-01-01
Supplement: d1ra03685h1.pdf [file d1ra03685h1.pdf]

# SUPPORTING INFORMATION

## CONTENT

1. *<sup>1</sup>H and <sup>13</sup>C NMR spectra of synthesized compounds* *Pag. S2*
2. *ROESY NMR Experiments* *Pag. S15*
3. *HRMS spectra* *Pag. S19*
4. *Titration Tables for Figure 4* *Pag. S24*

1.  $^1\text{H}$  and  $^{13}\text{C}$  NMR spectra of crude synthesized compounds.

**NOTE**

*The attached spectra of synthesized compounds refer to samples at the 95% of purity, and sometimes may contain traces of solvents.*

*However, we checked that the mentioned impurities not affecting the other signals, in order to assign the structure beyond any reasonable doubt.*

*This was done to save precious pure samples for the subsequent synthetic steps and final analyses.*

Further spectroscopic materials (COSY, NOESY, TOCSY, HSQC, Titration spectra and tc spectra) are available upon request by citing the present paper.

# 7a

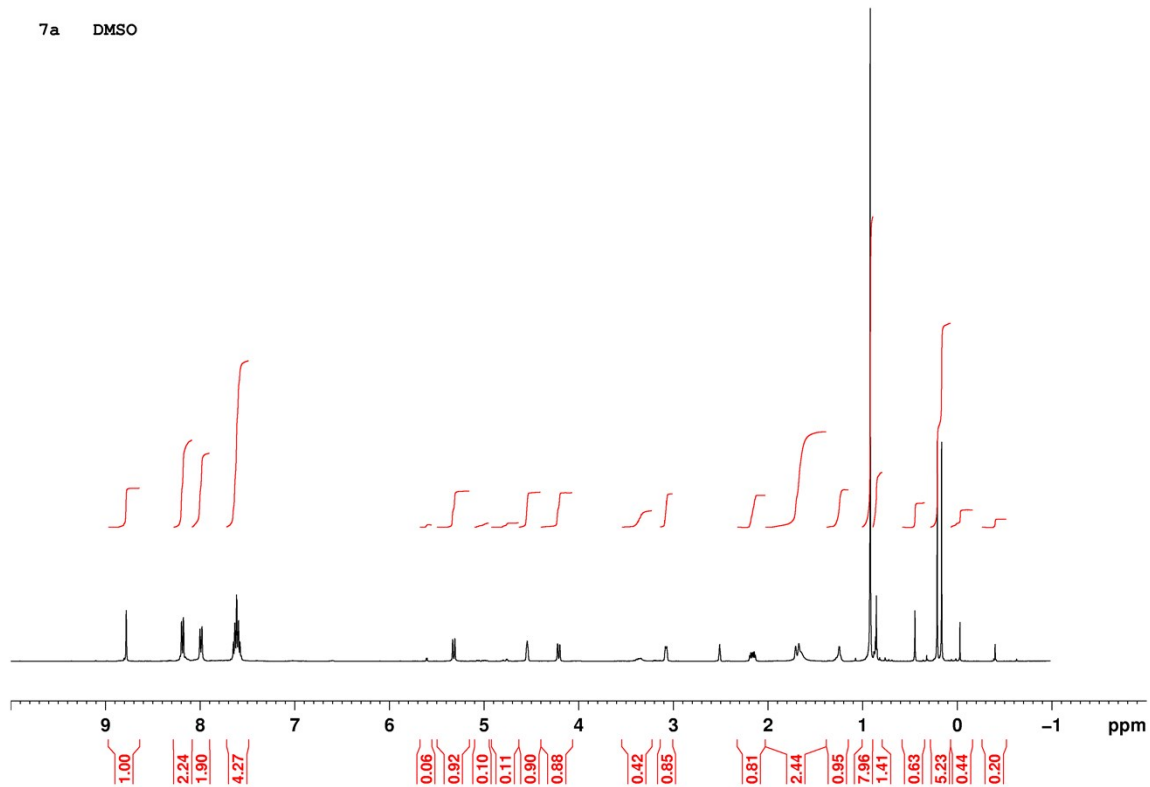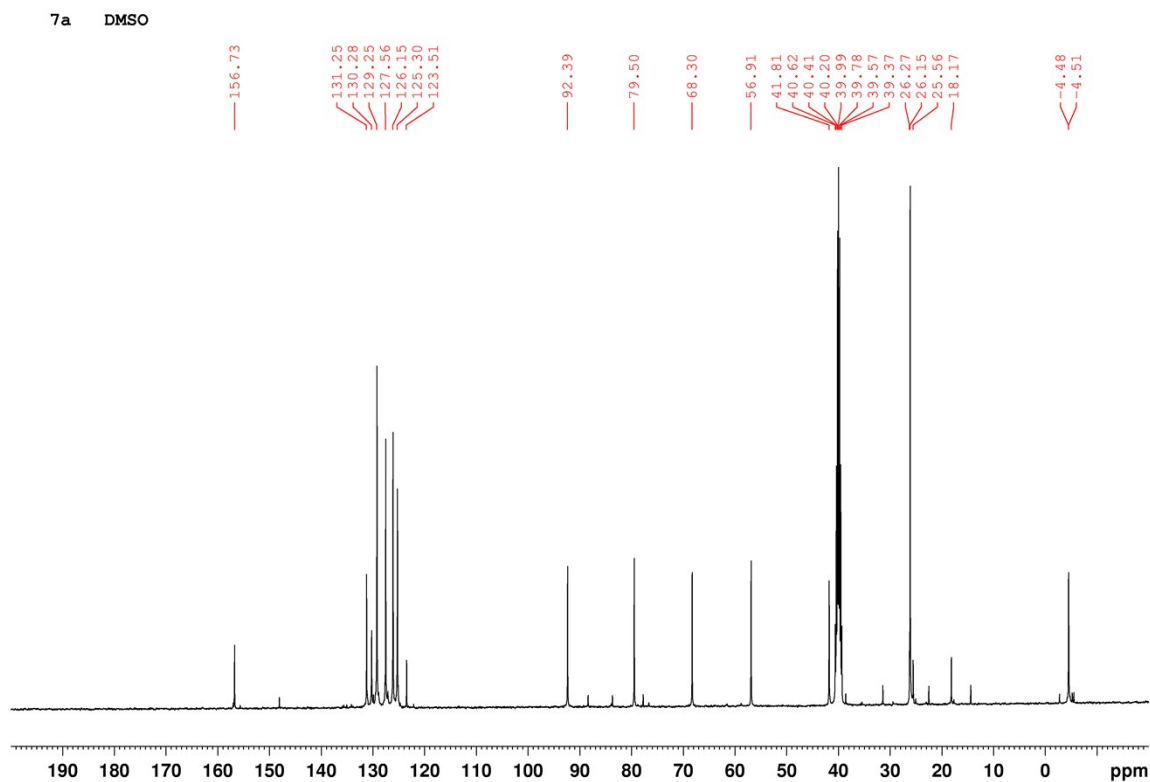

7b

7b DMSO

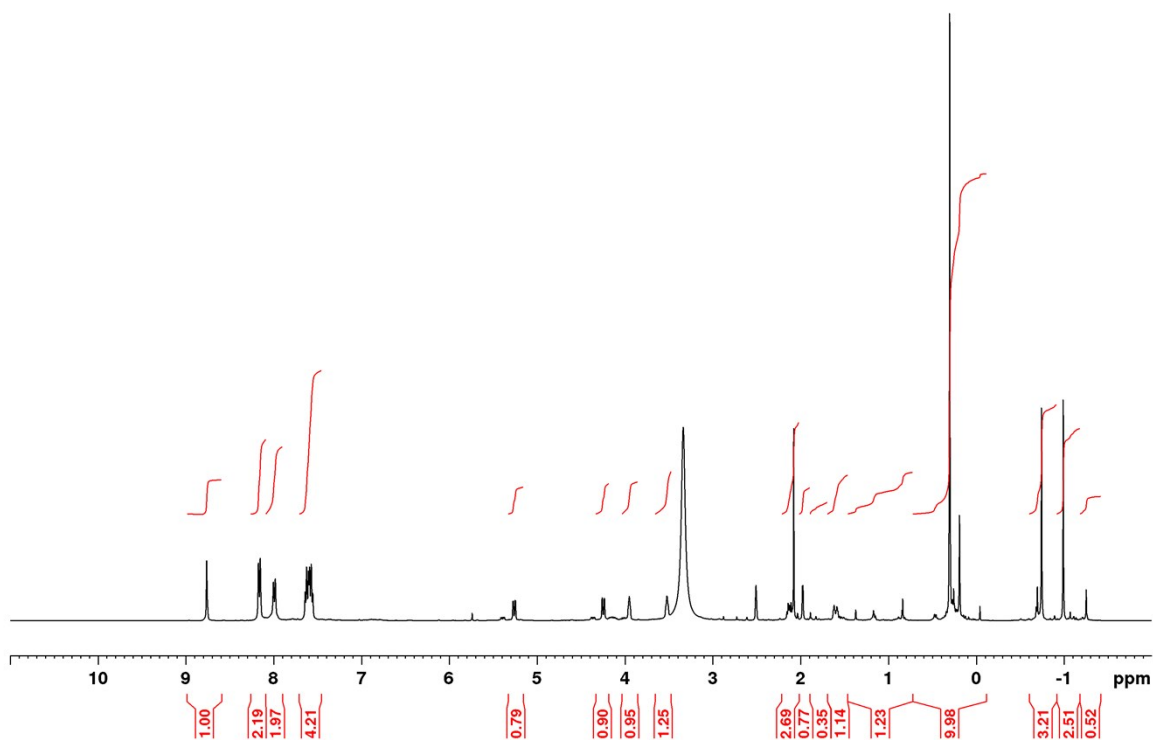

7b DMSO

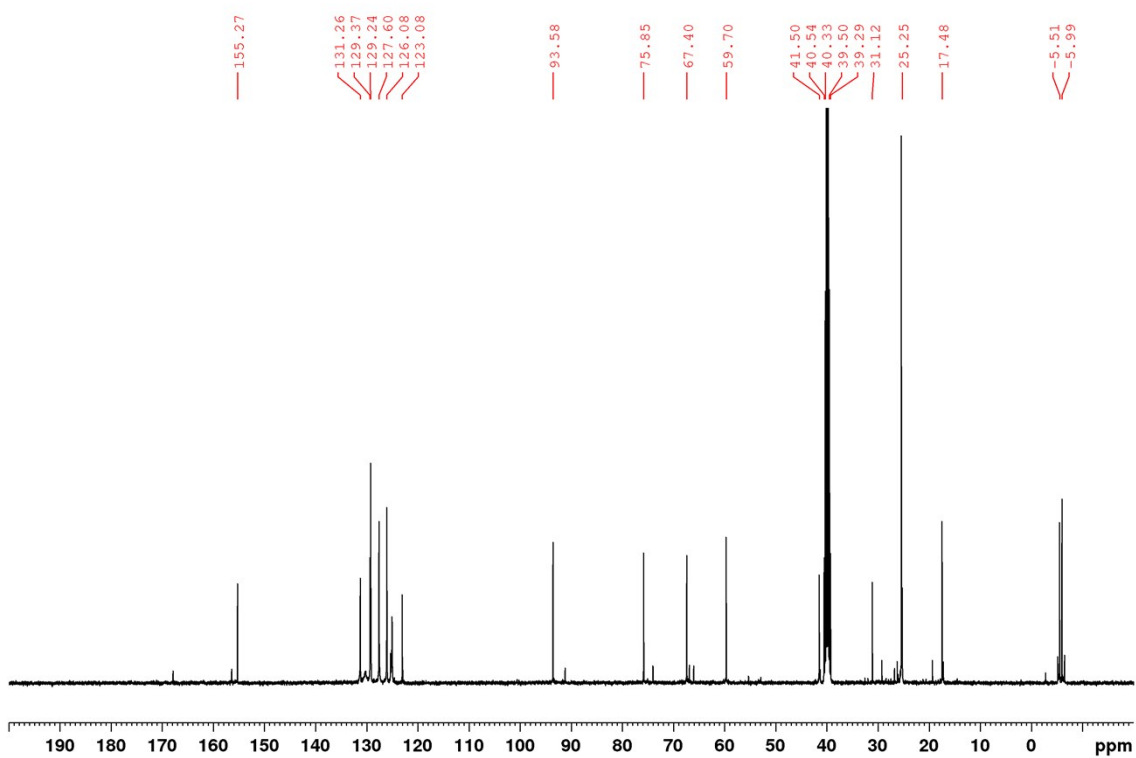

8a

8a DMSO

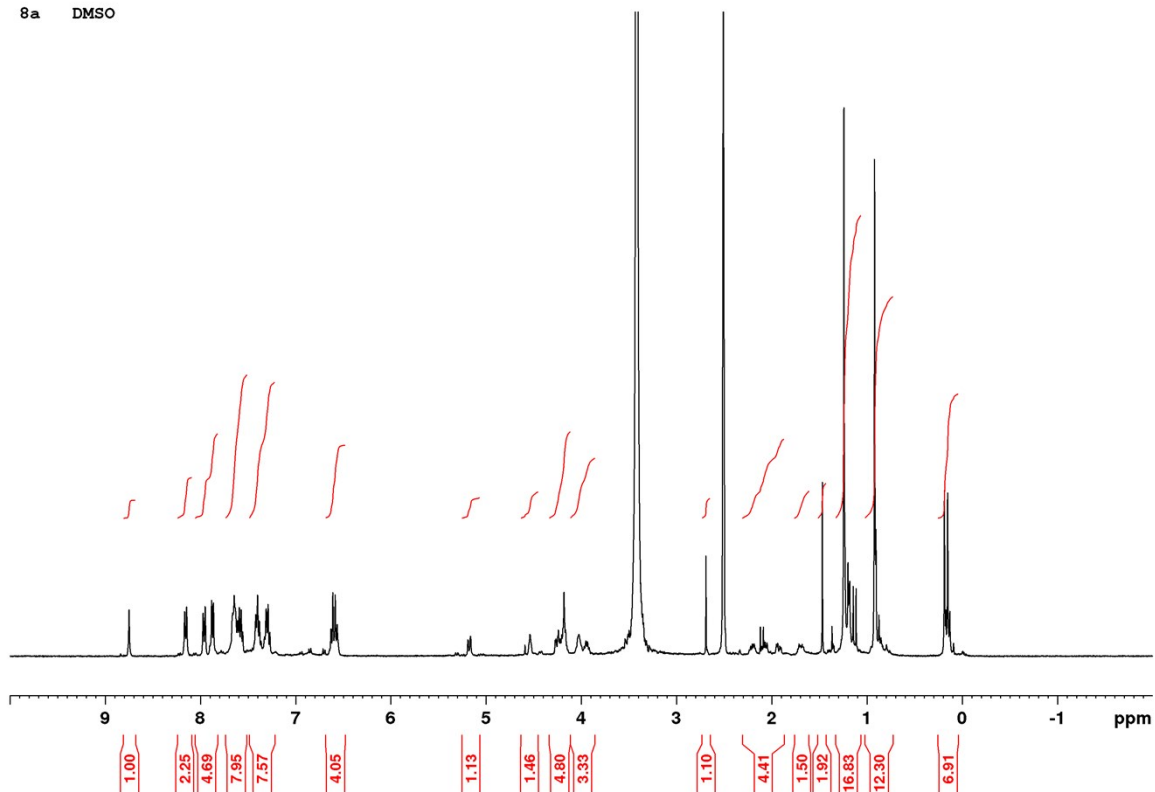

8a DMSO

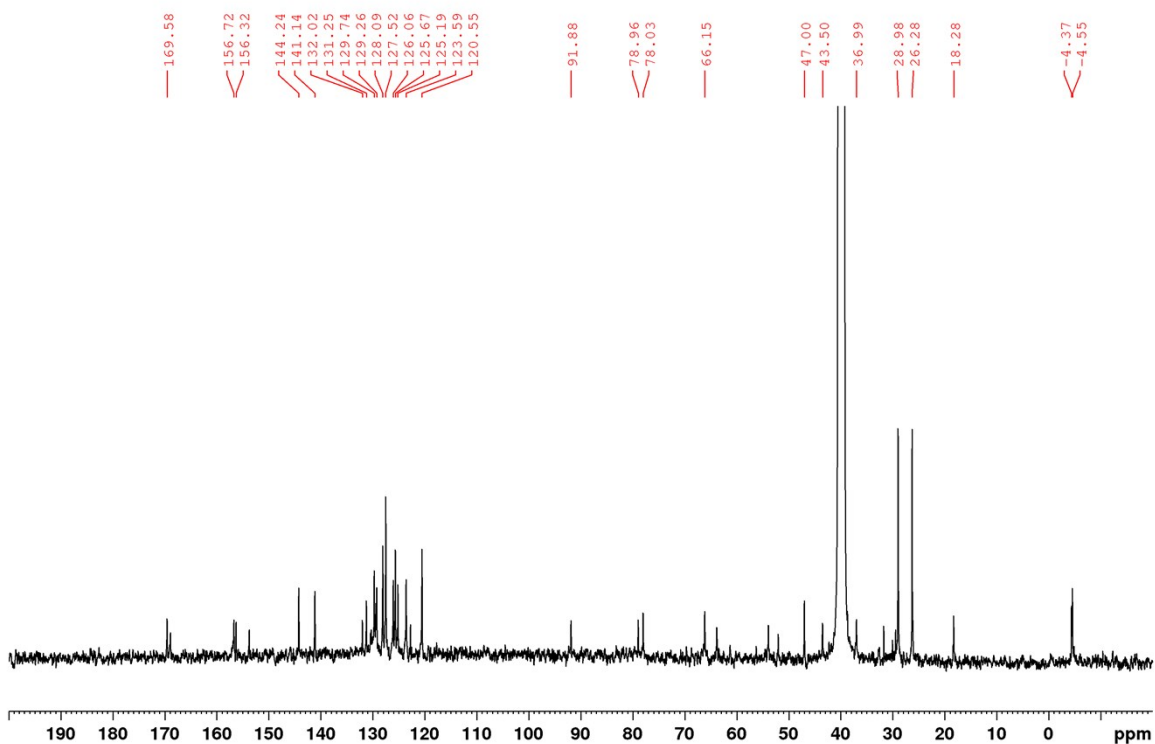

8b

8b DMSO

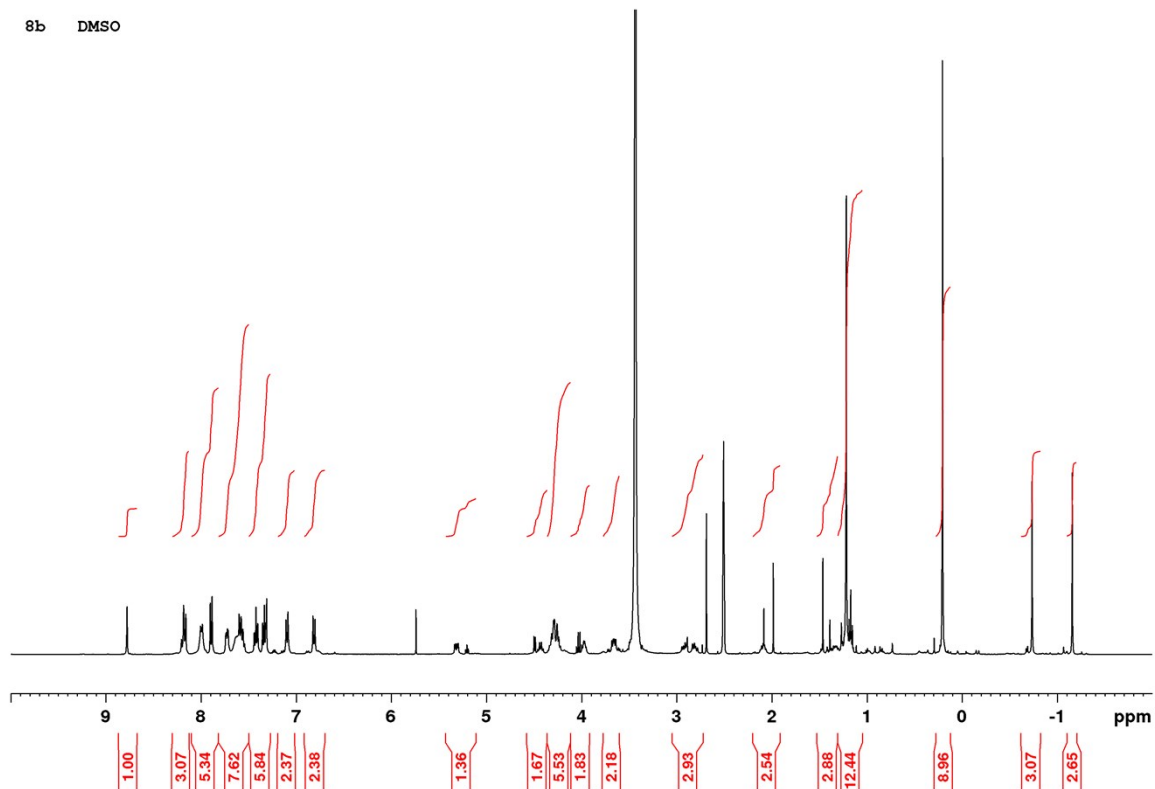

8b DMSO

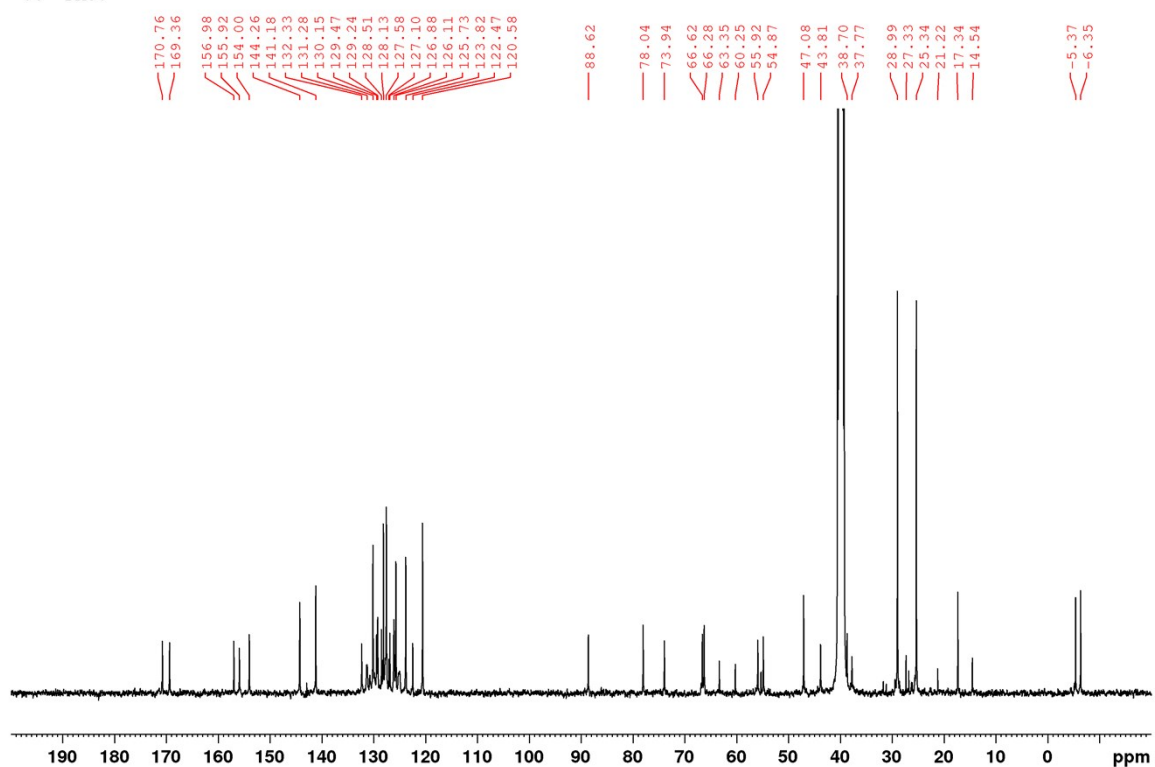

9a

9a DMSO

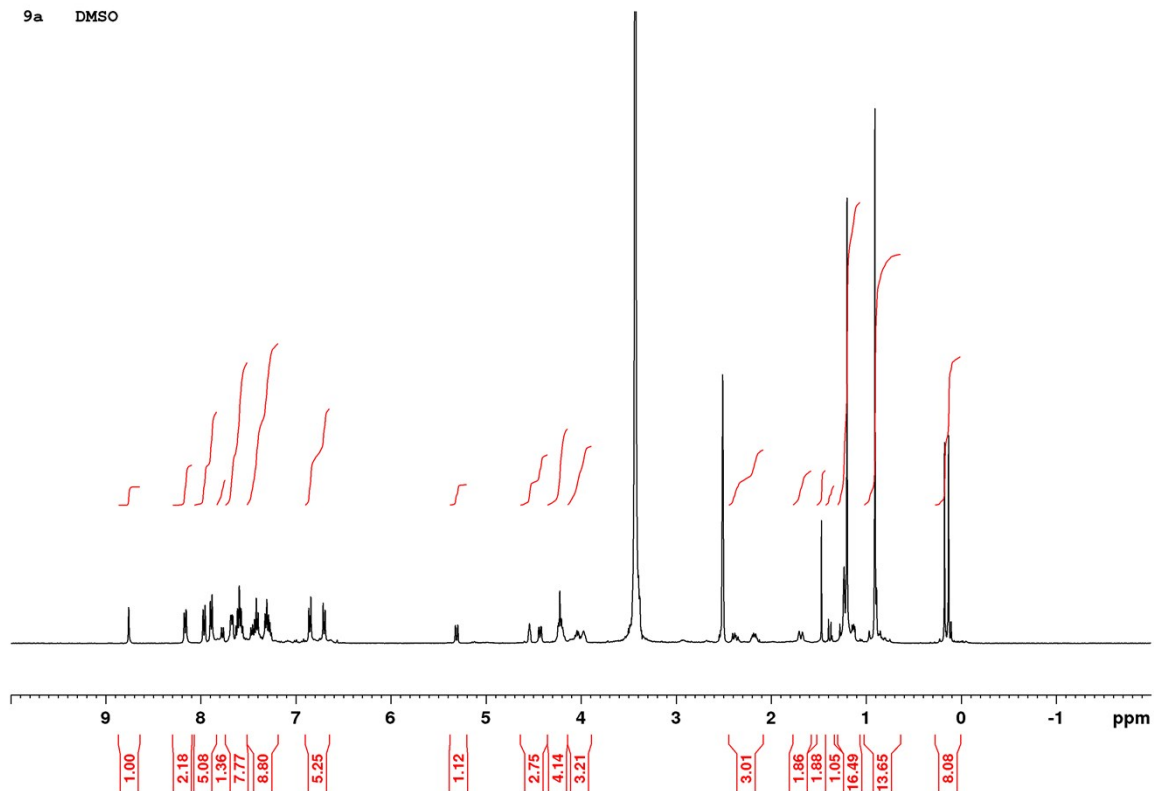

9a DMSO

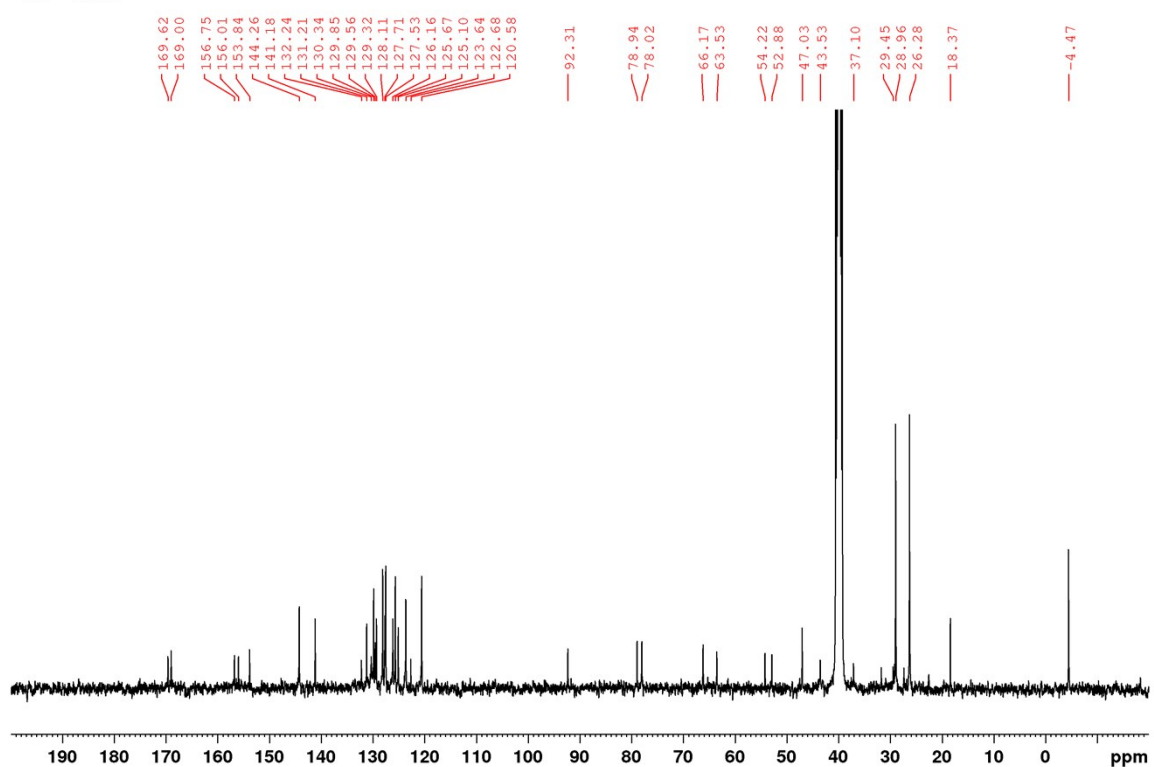

9b

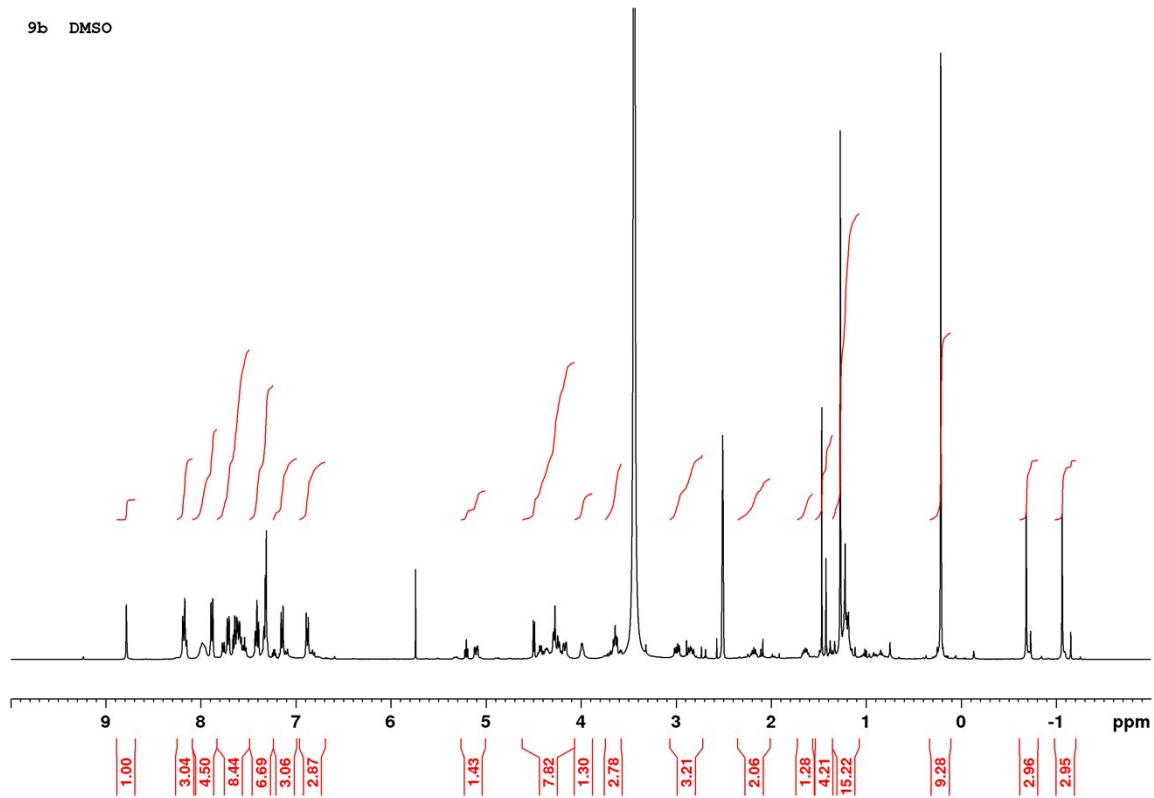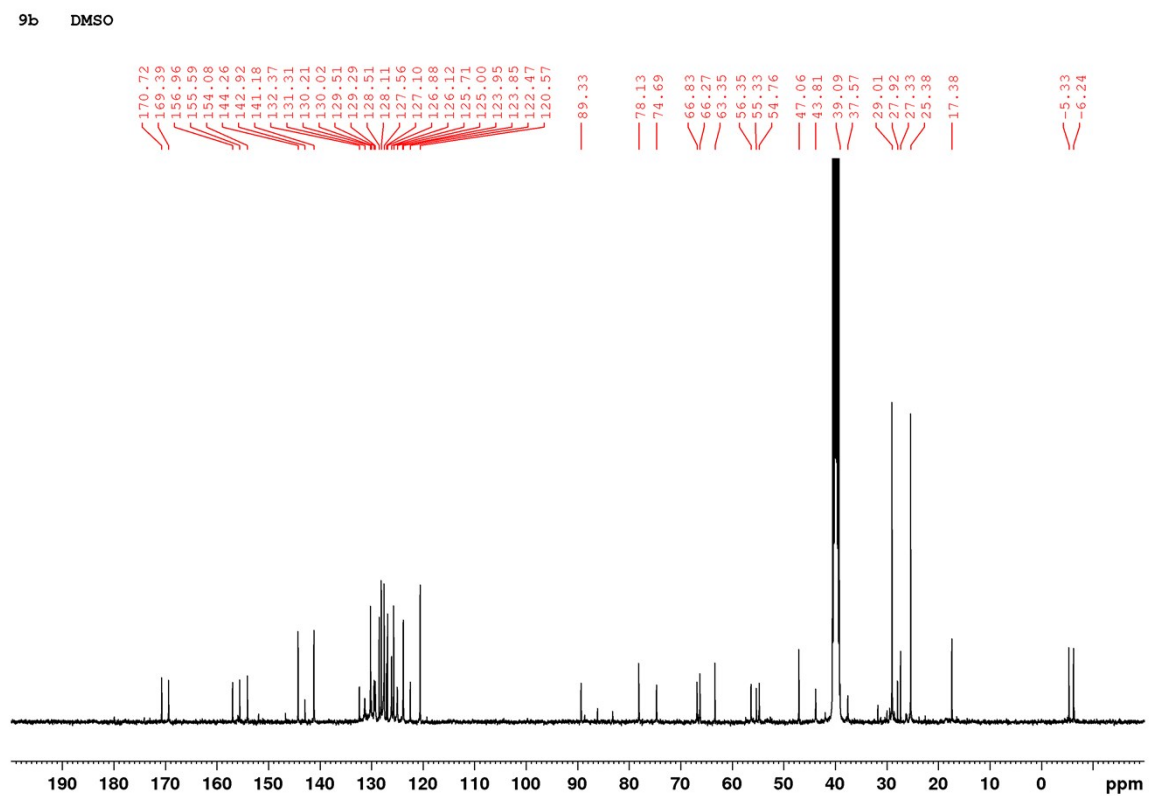



# 10a

10a DMSO

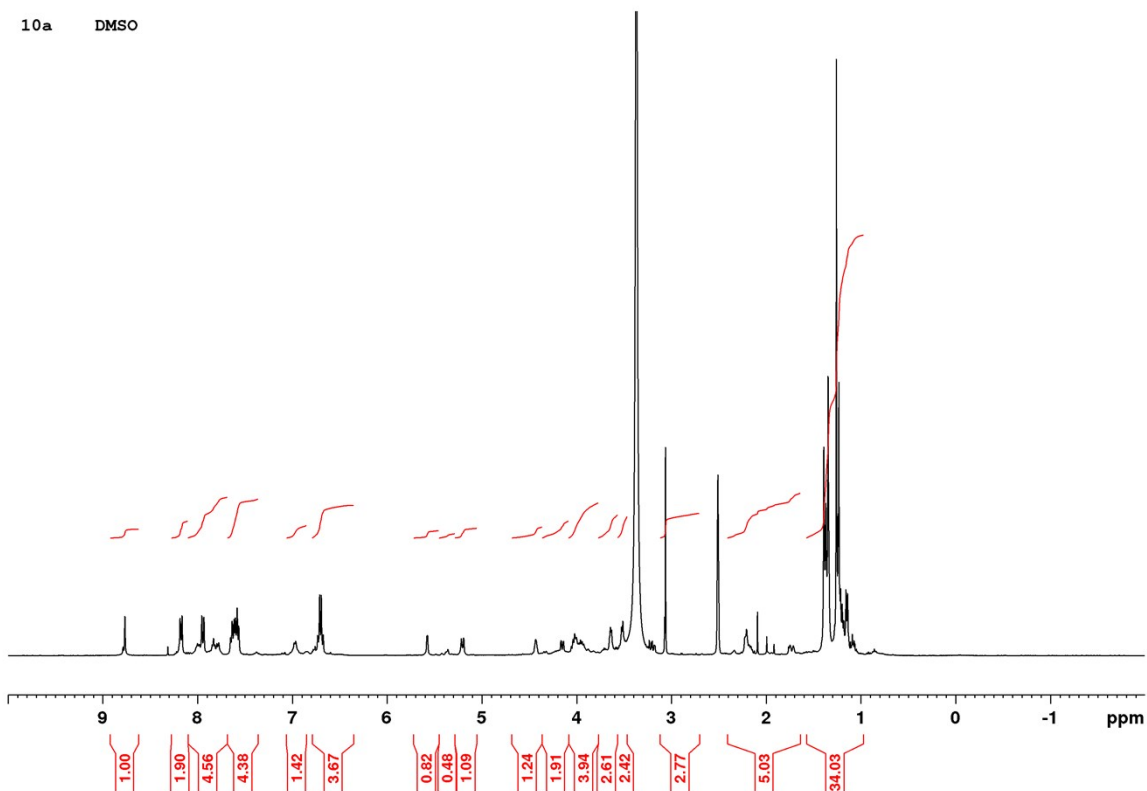

10a DMSO

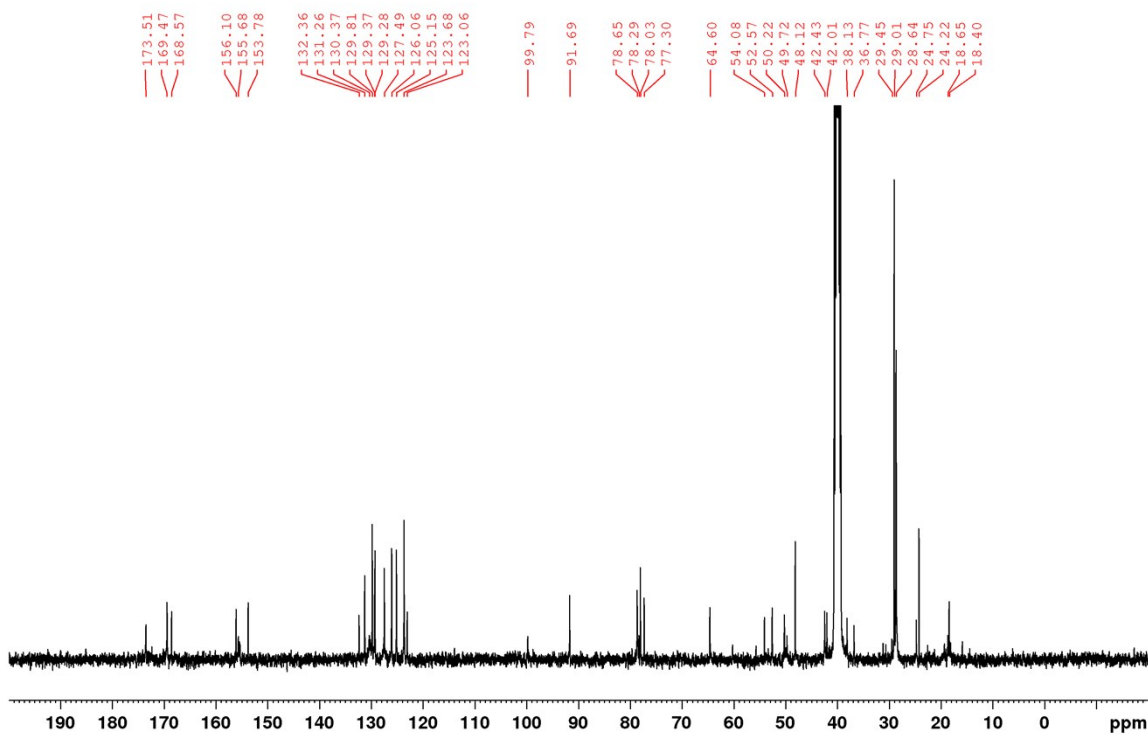

10a DMSO-d6

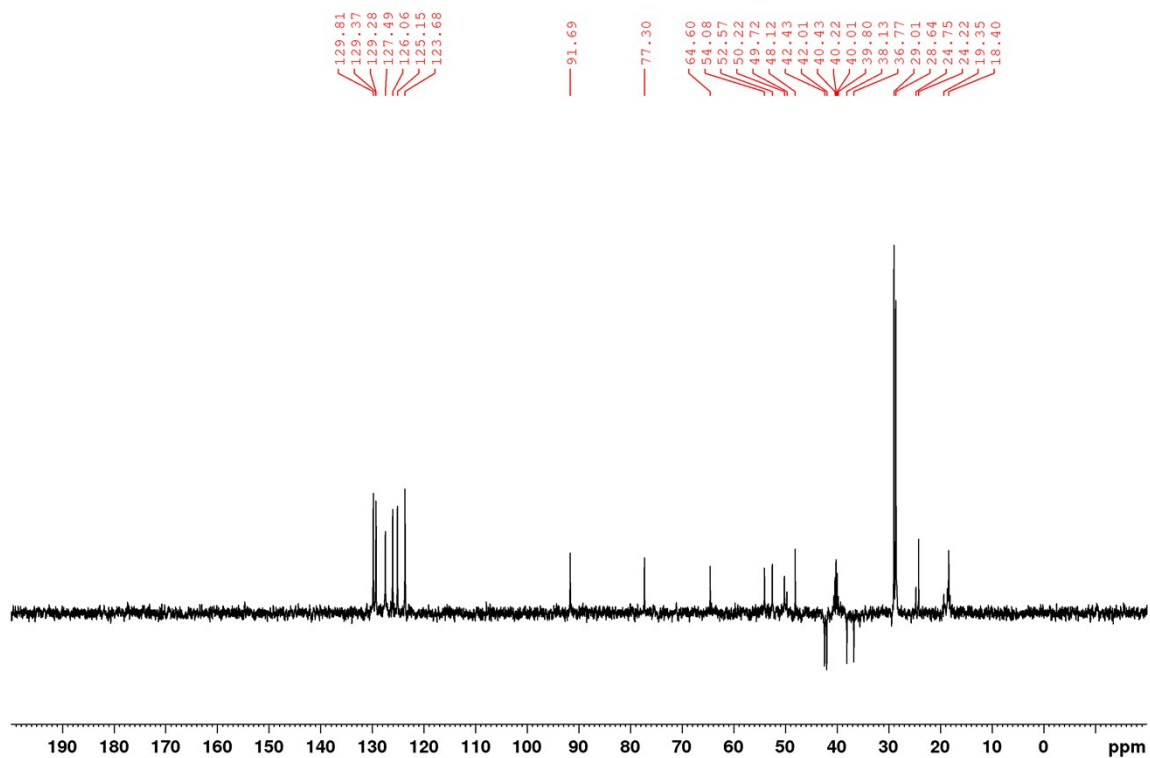

10b

10b DMSO

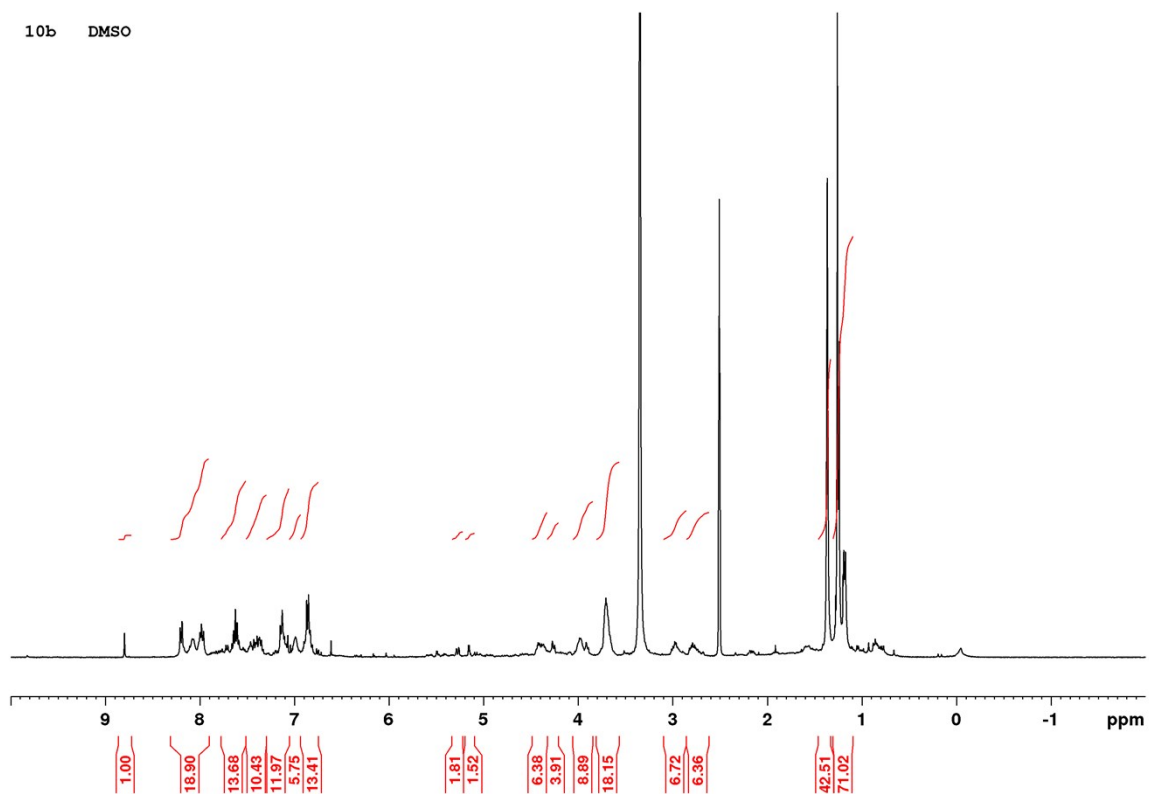

10b DMSO

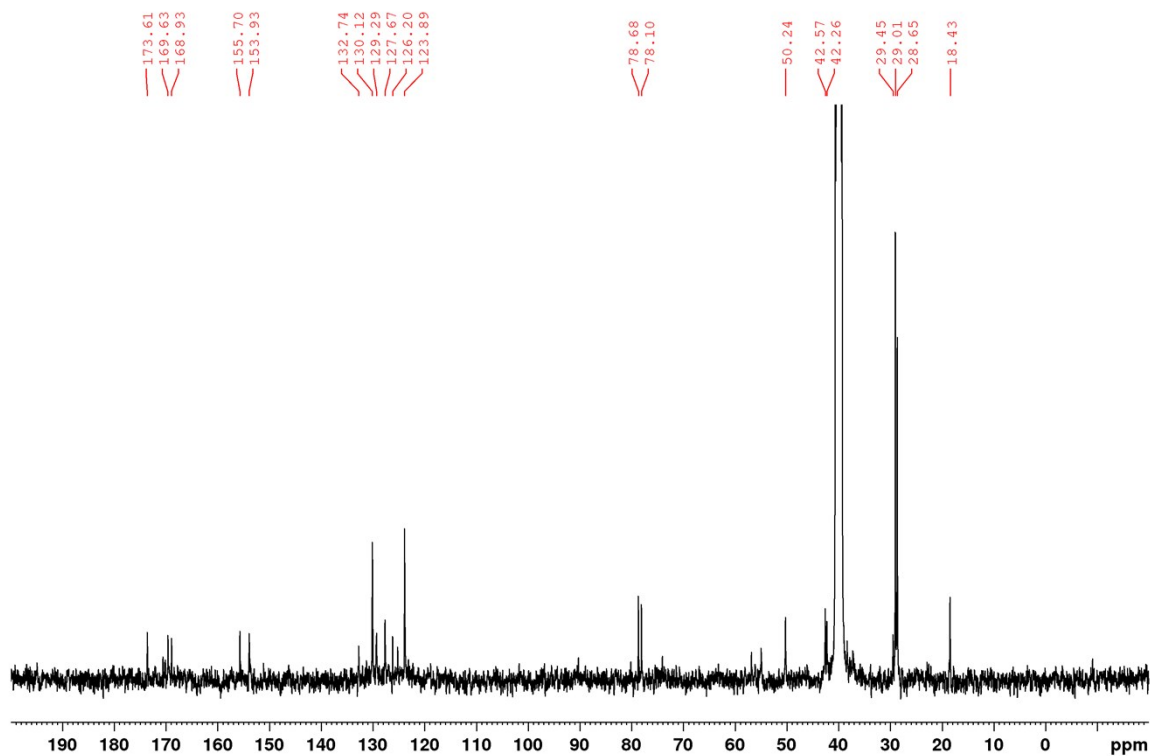

10b DMSO-d6

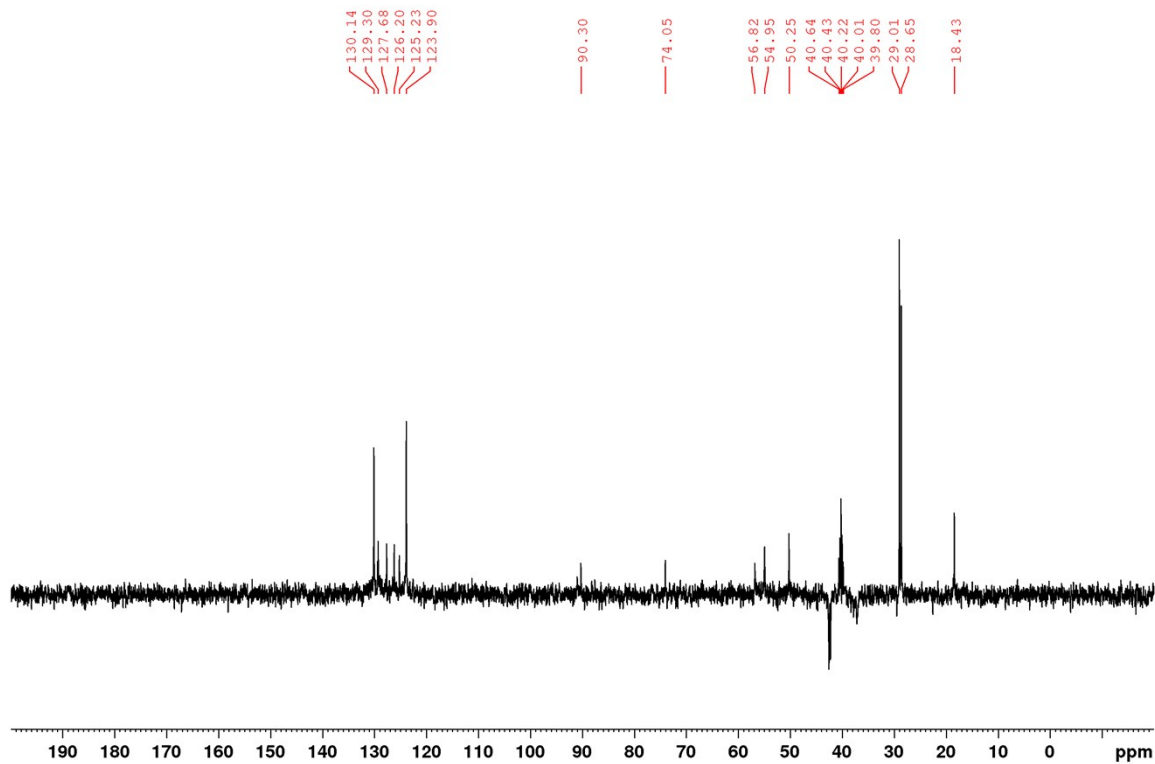

# 11a

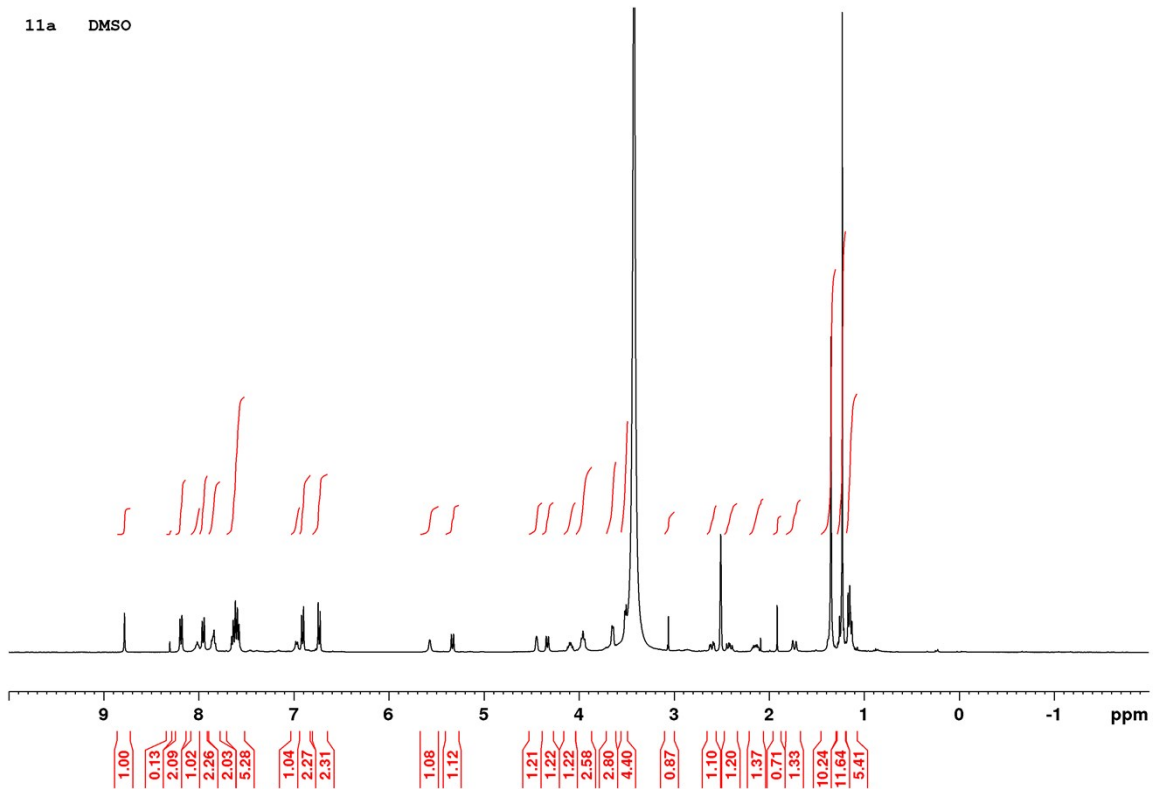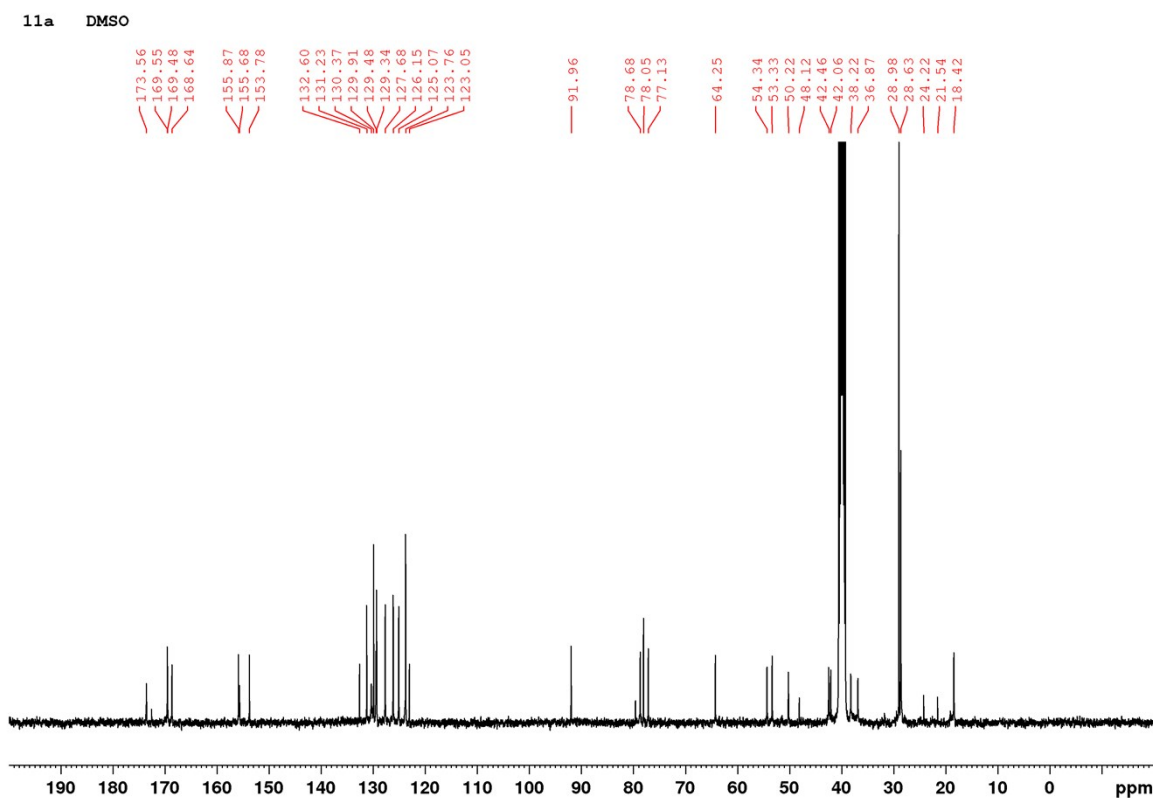

11a DMSO-d6

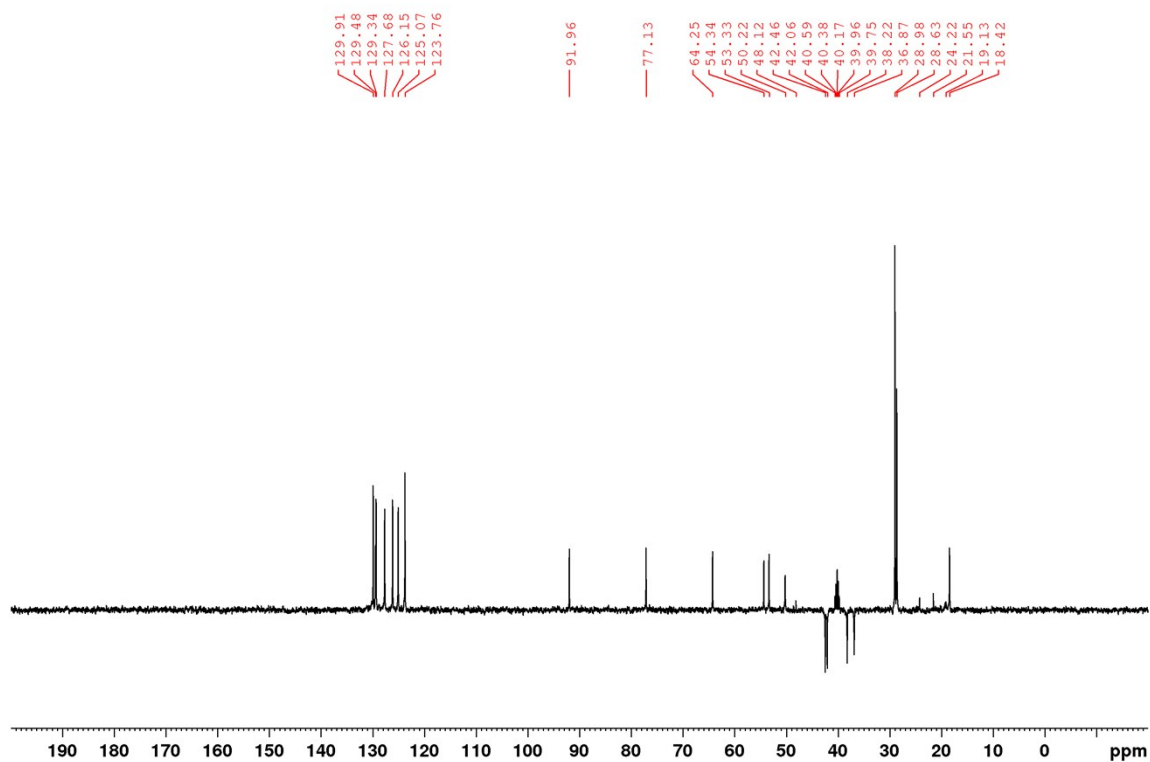

11b

11b DMSO

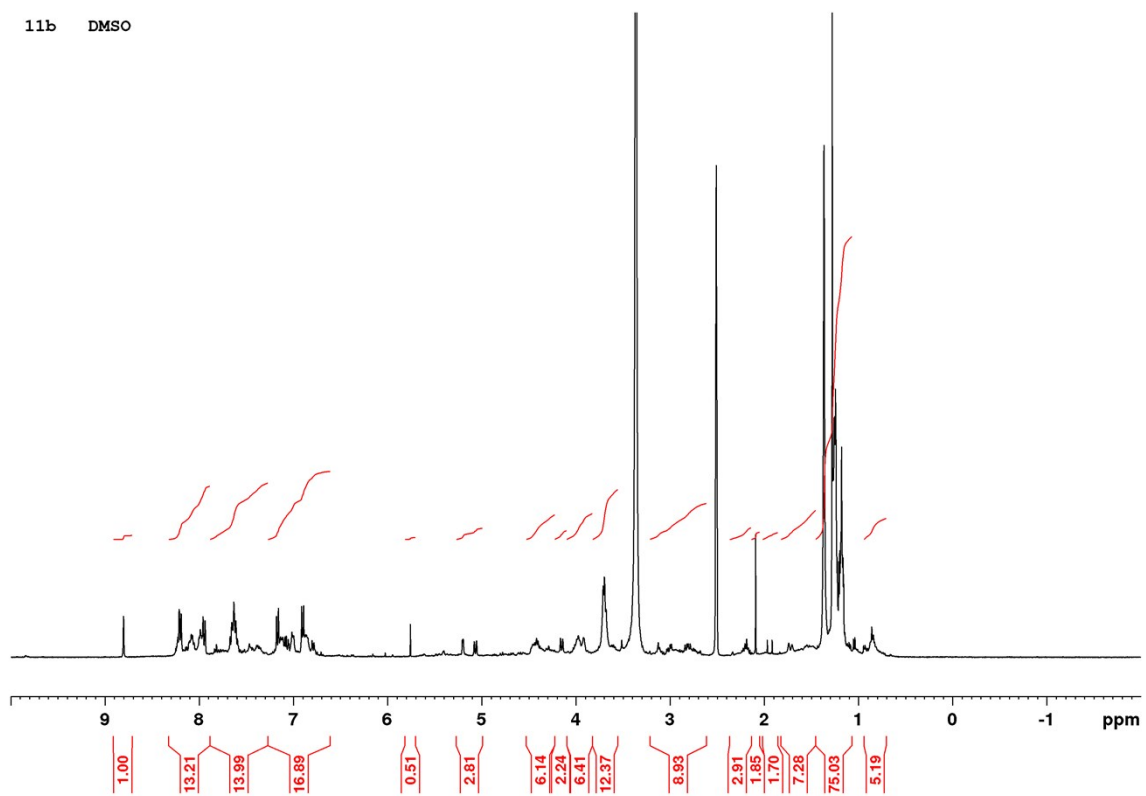

11b DMSO

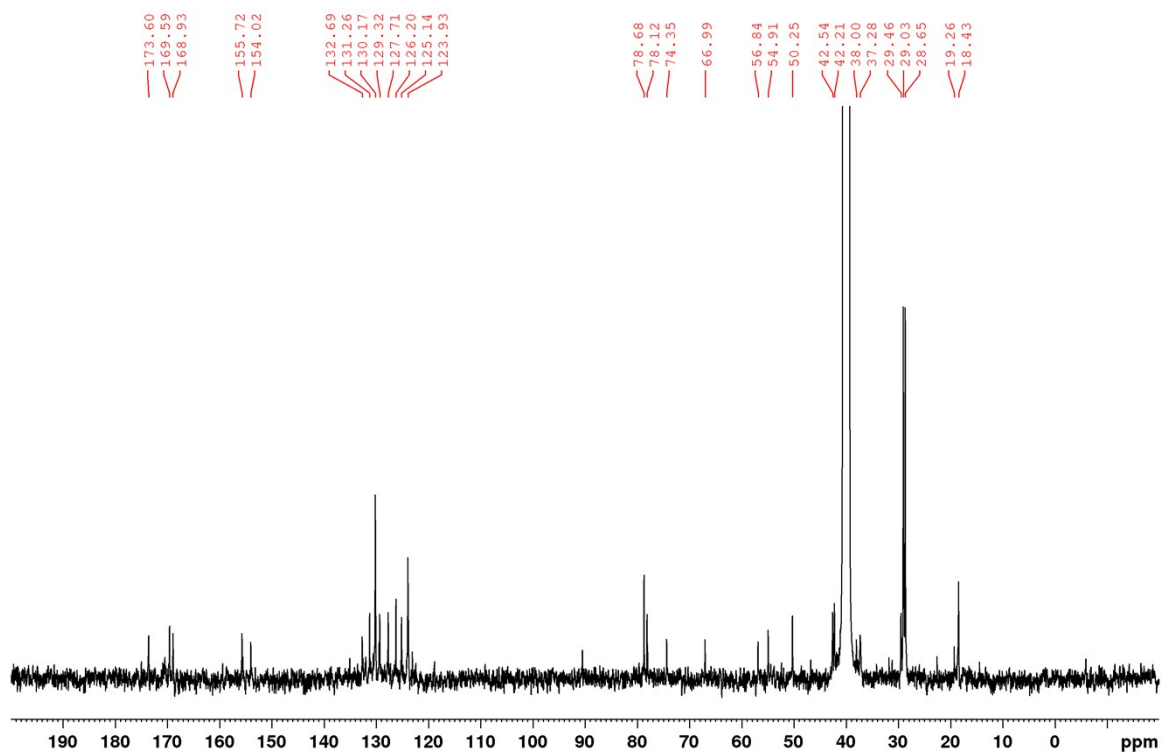

11b DMSO-d6

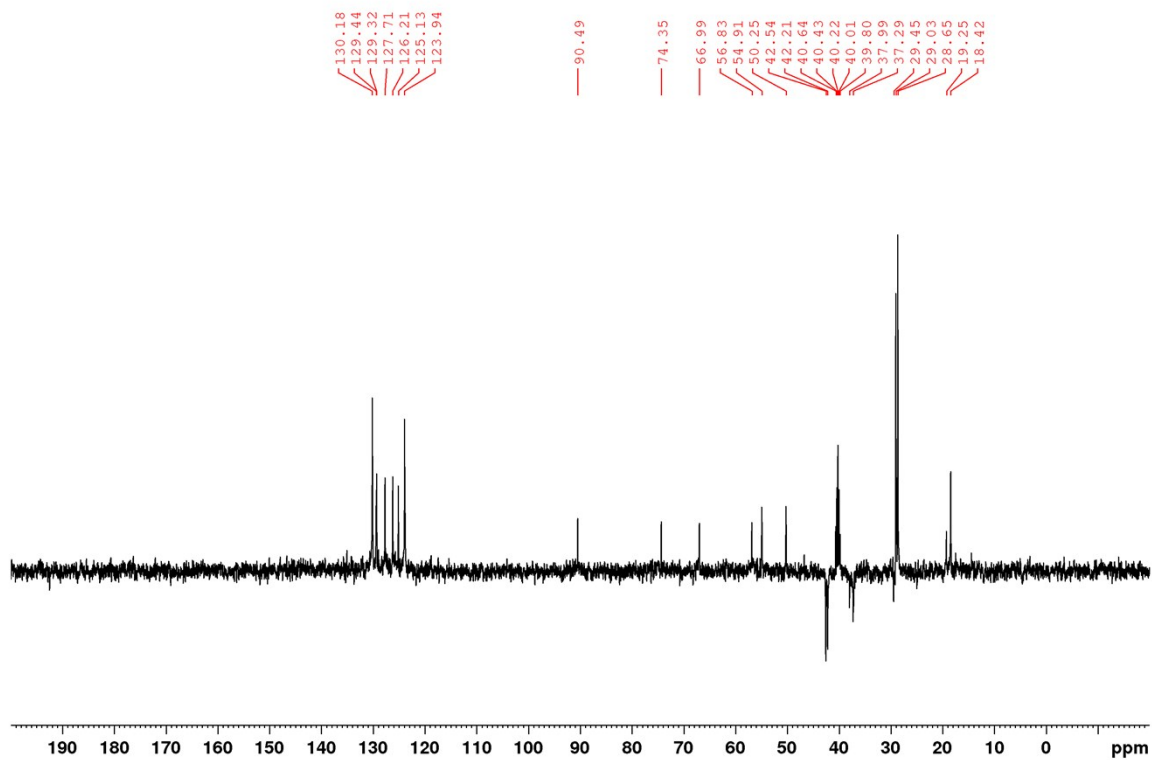

2. ROESY NMR Experiments: Top)  $H_{\alpha}H_N$  region; Bottom)  $H_NH_N$  region

10a

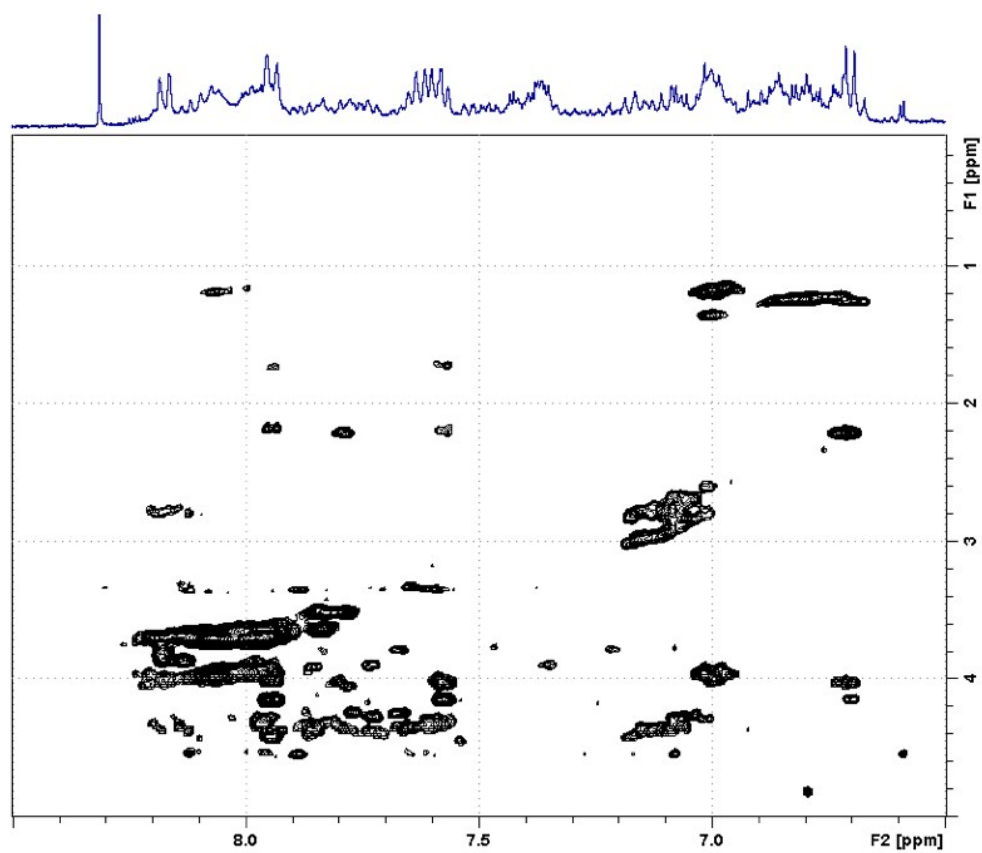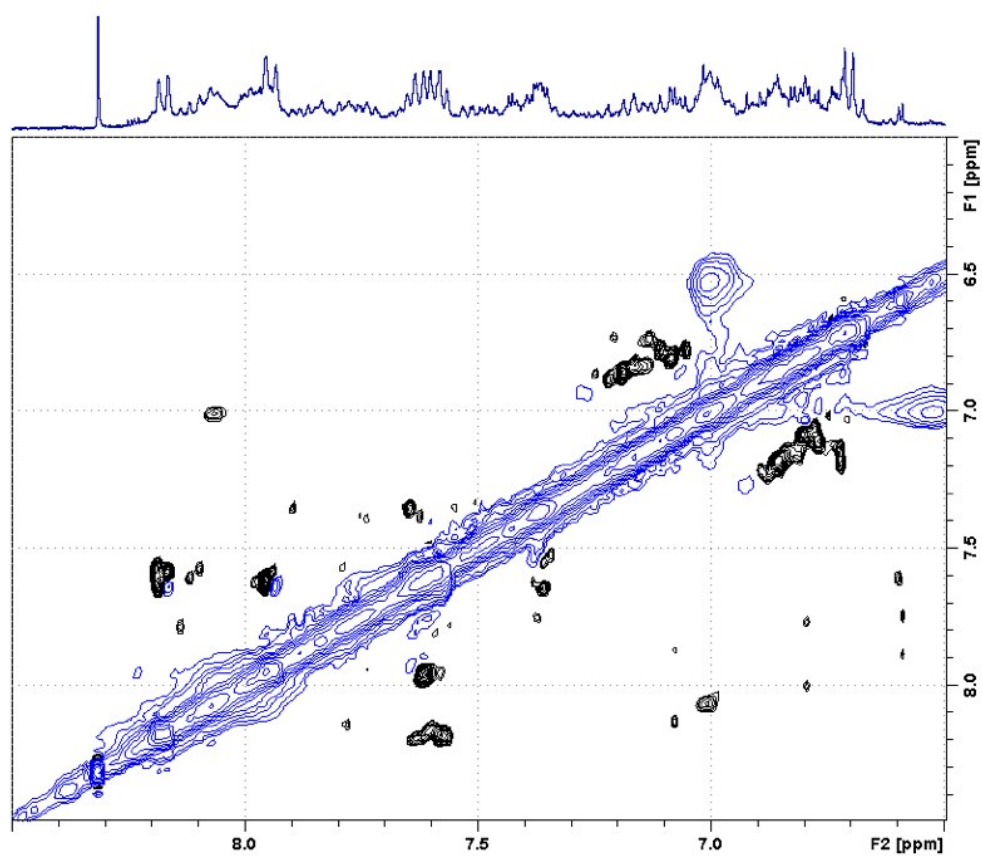

10b

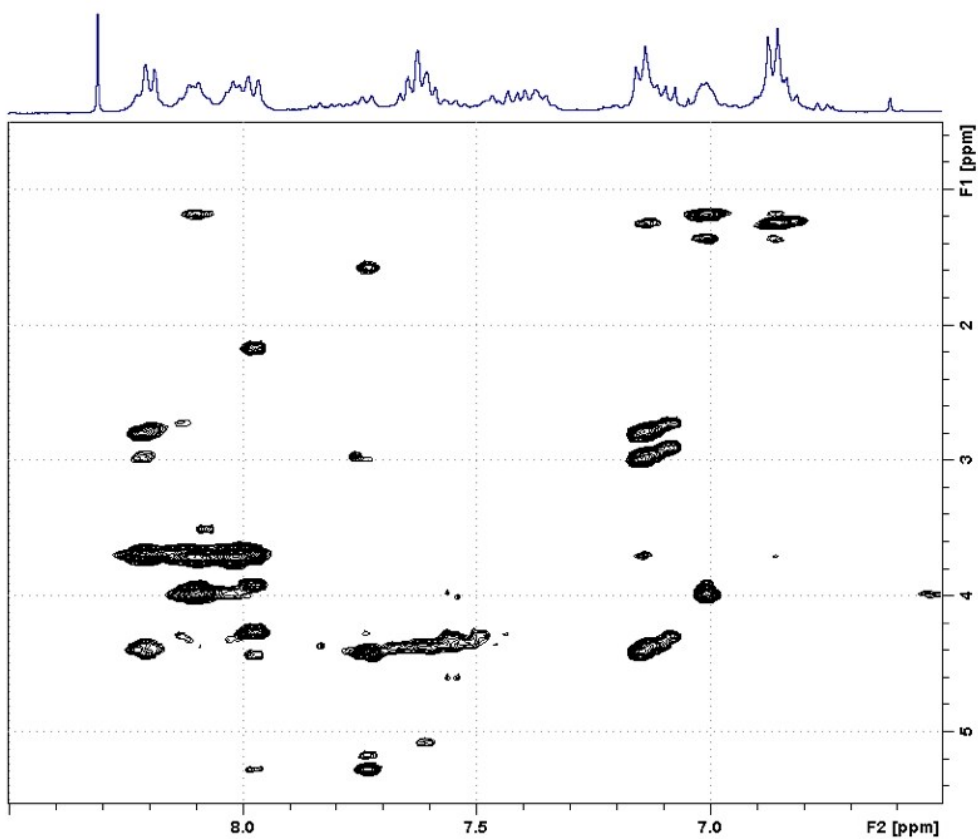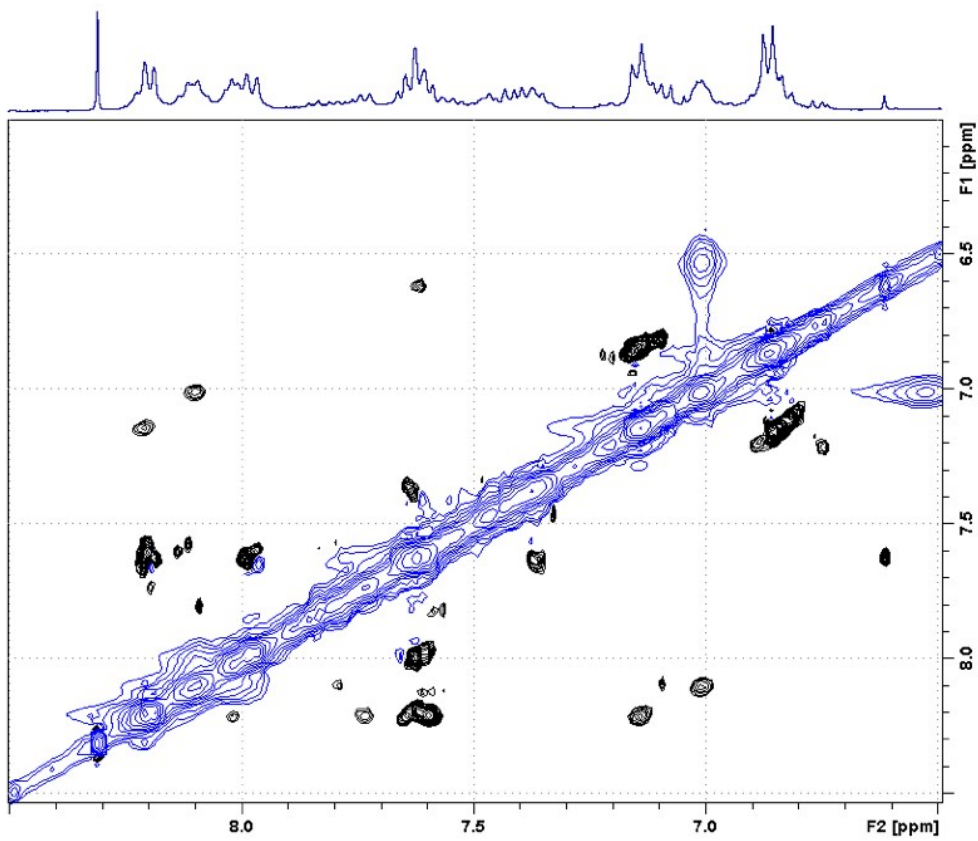



11a

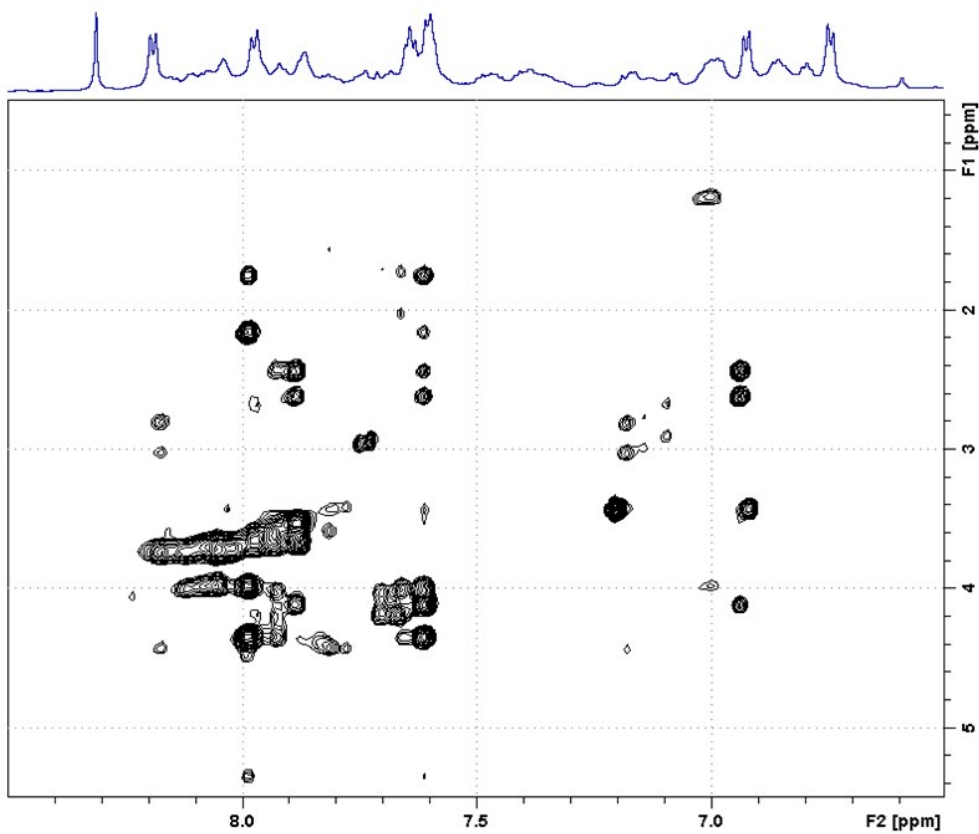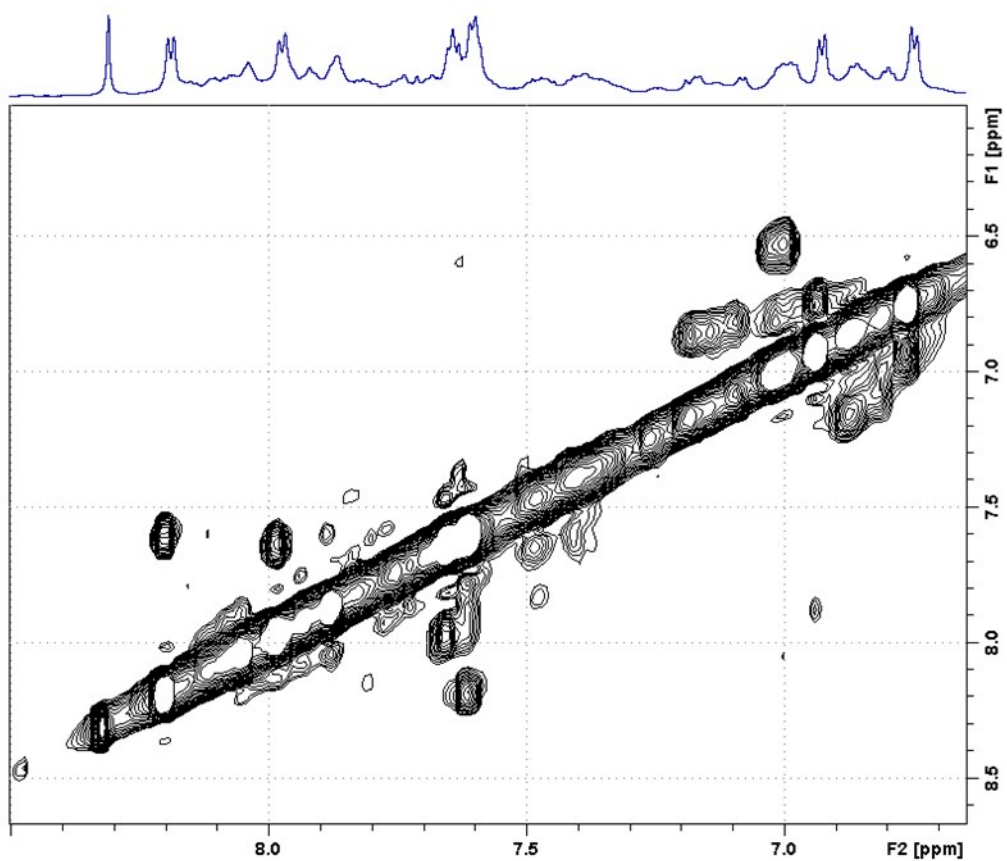

11b

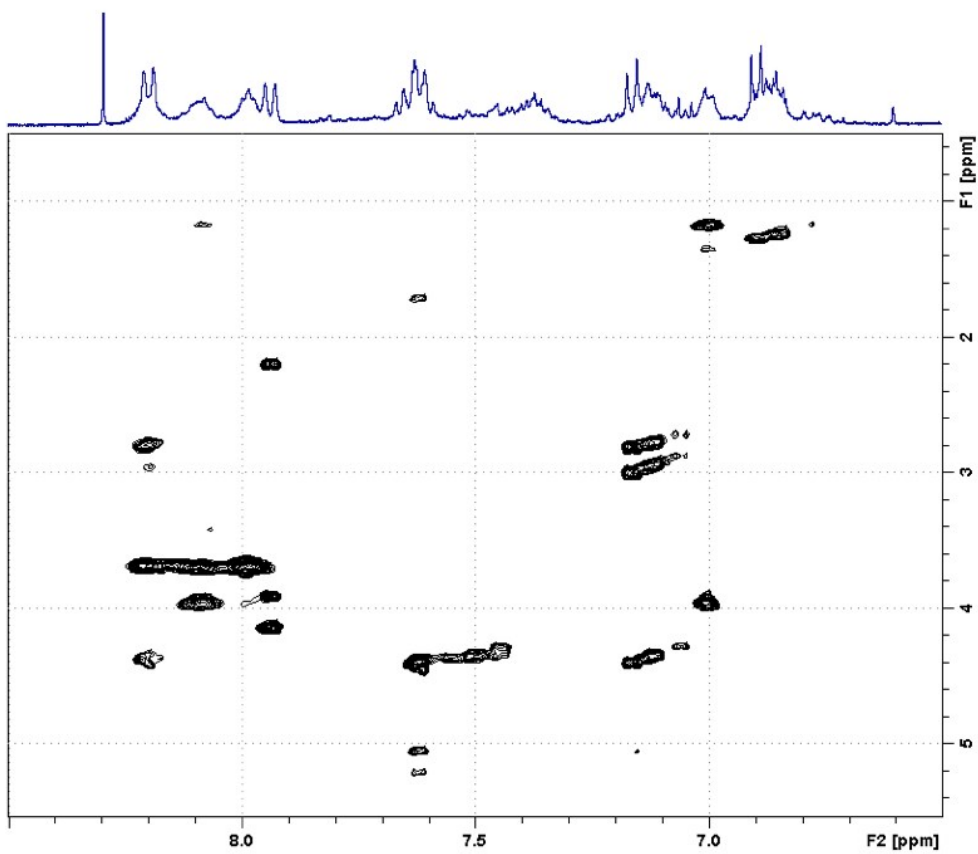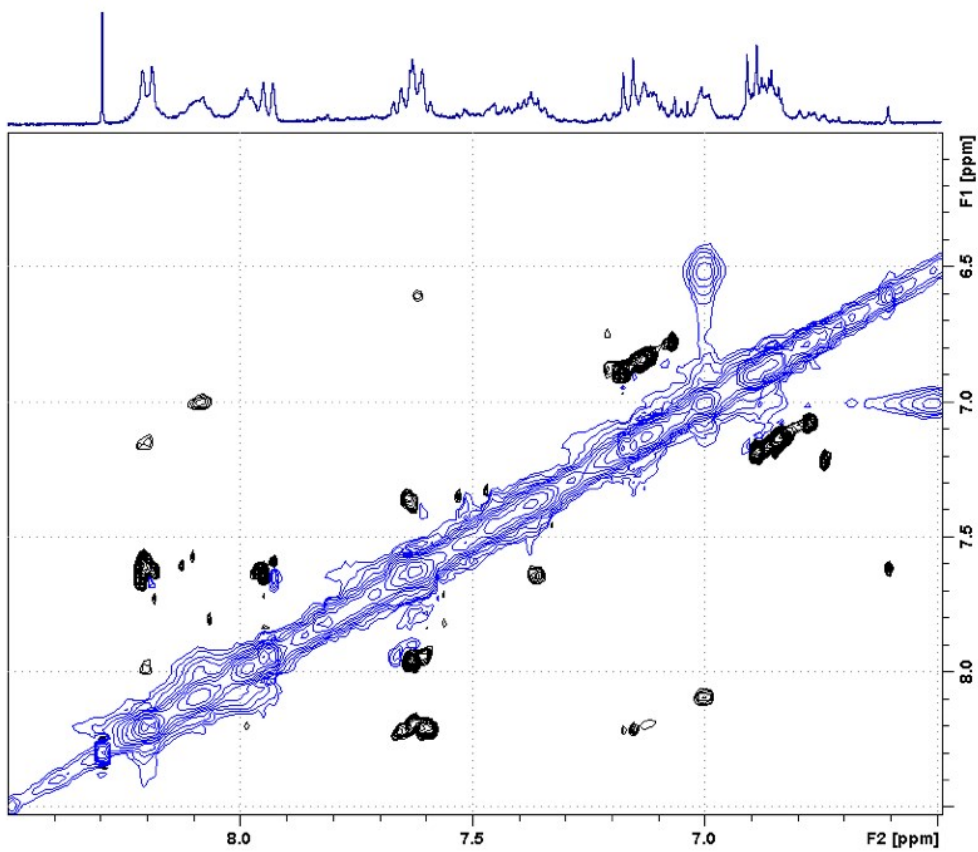

### 3. HRMS spectra

7a

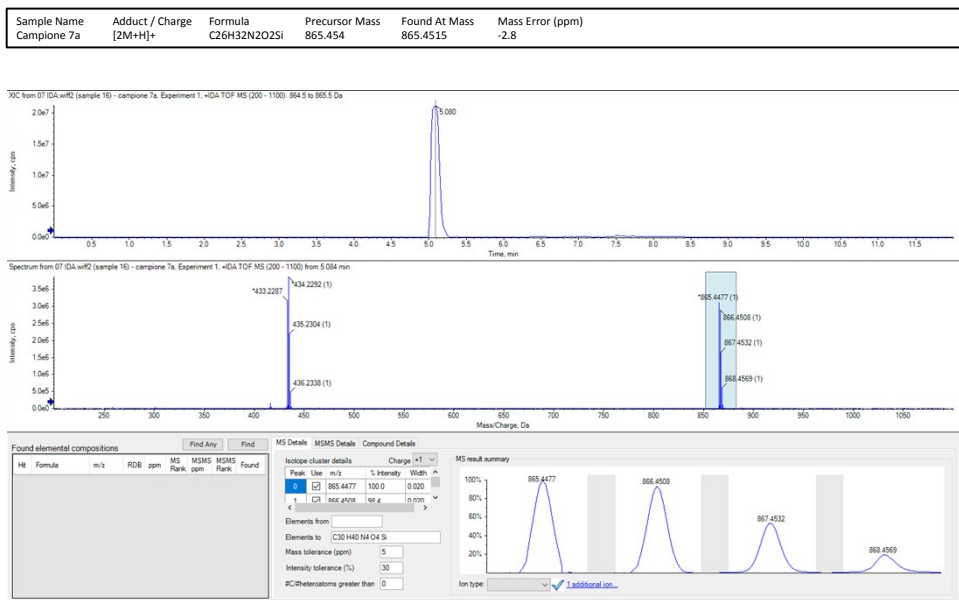

7b

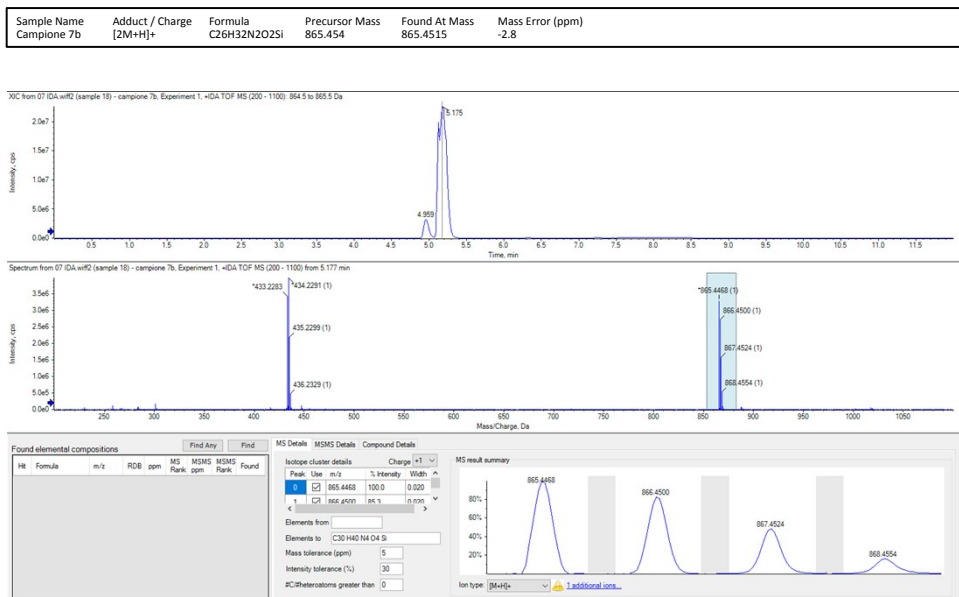

8a

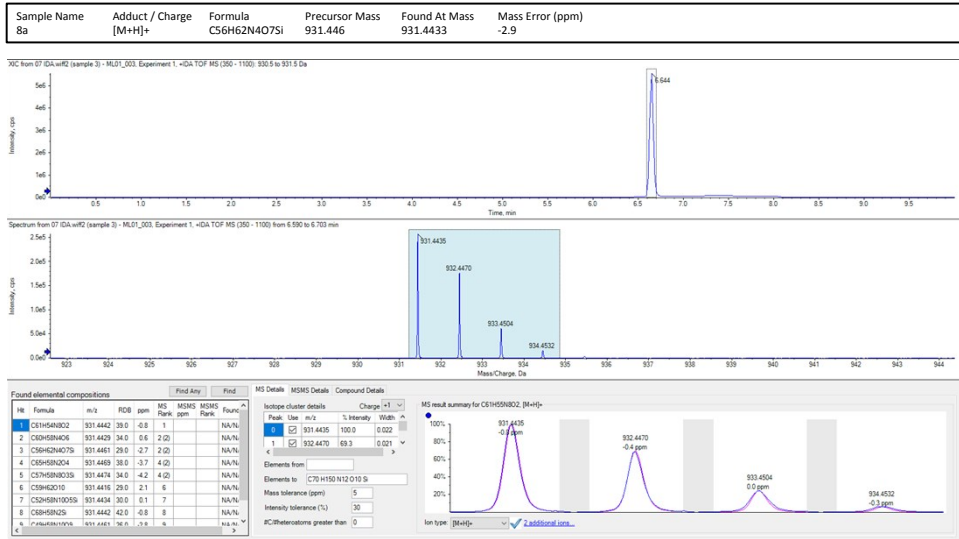

8b

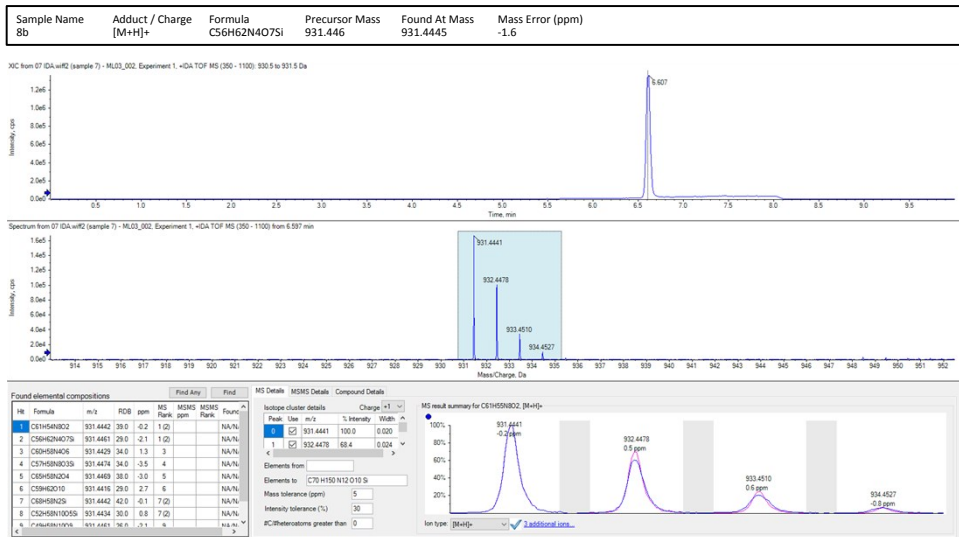

9a

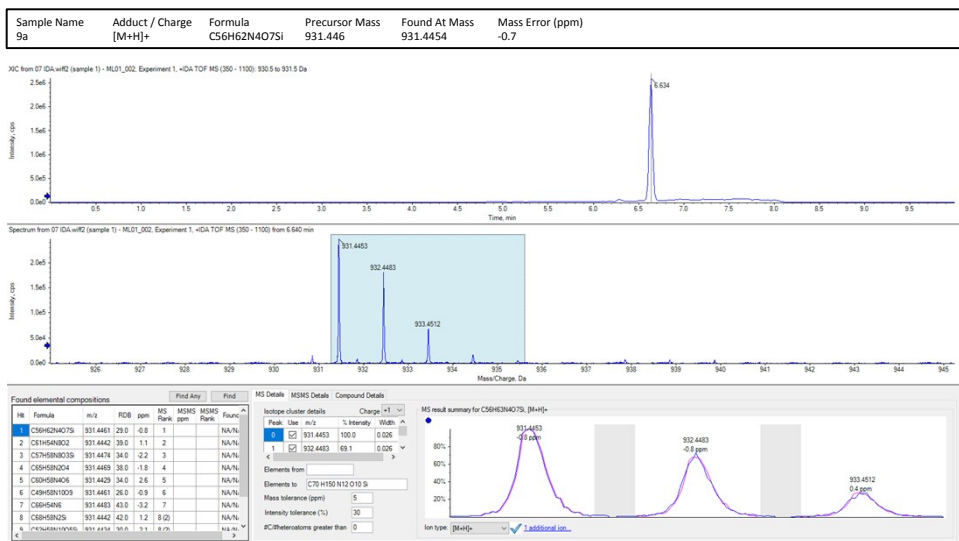

9b

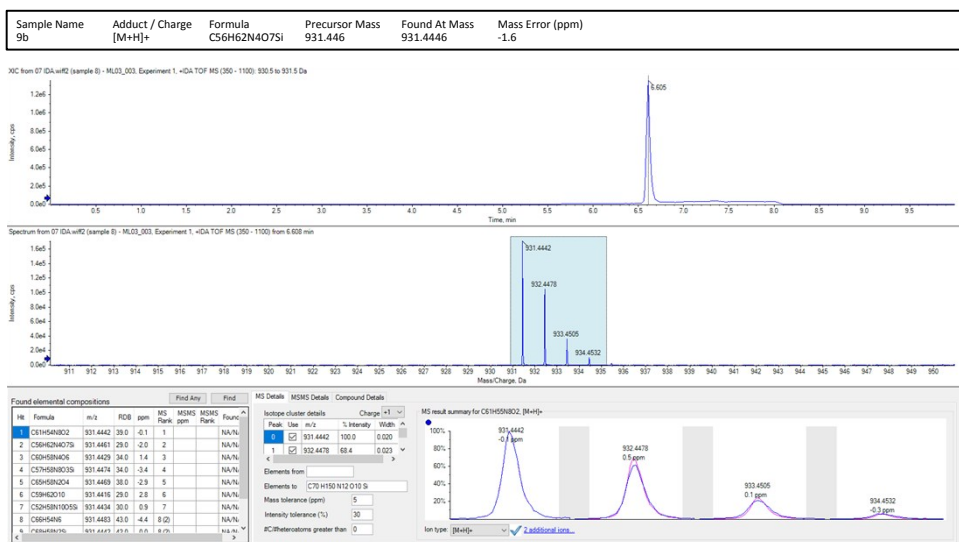

10a

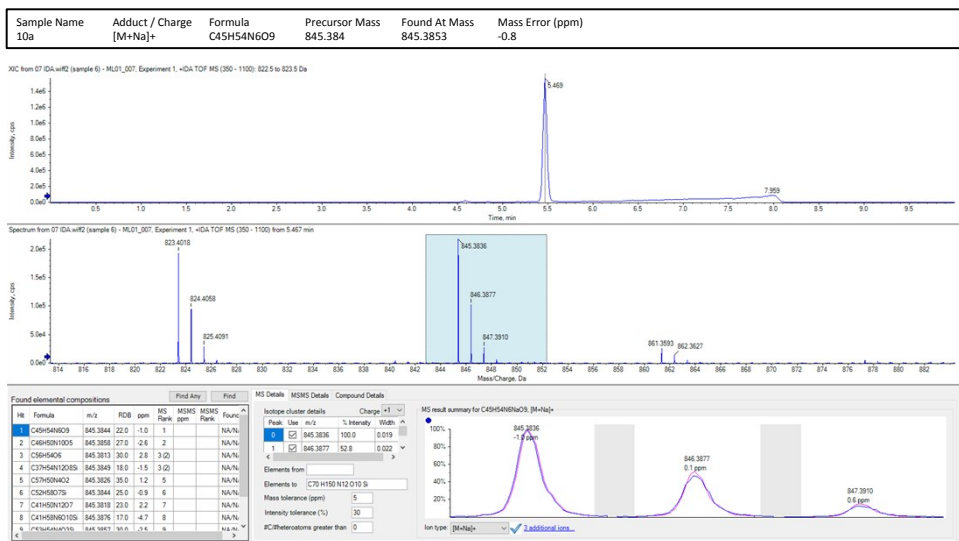

10b

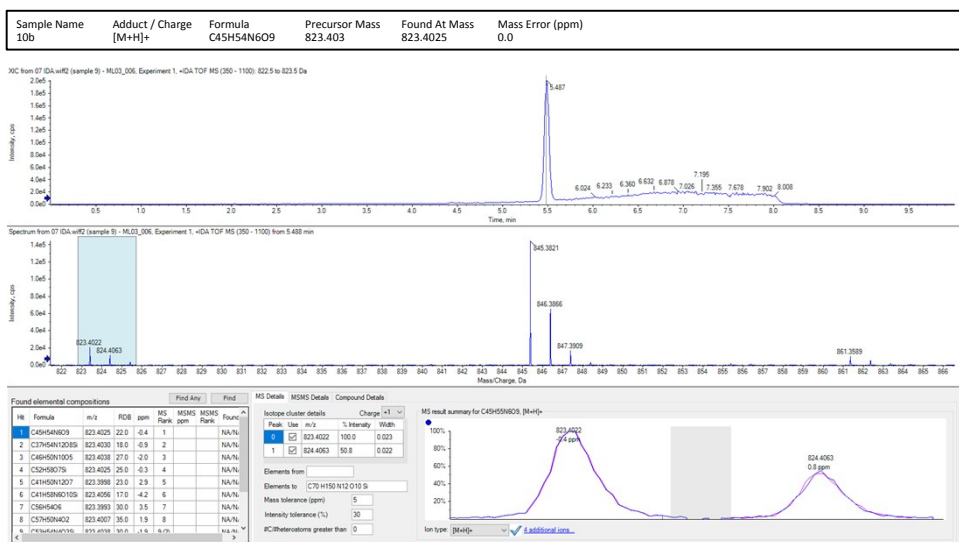

11a

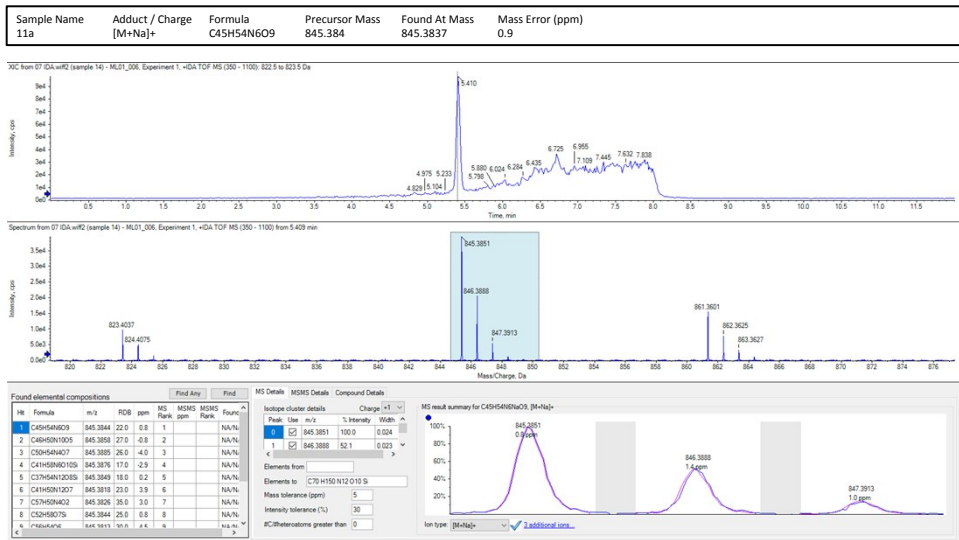

11b

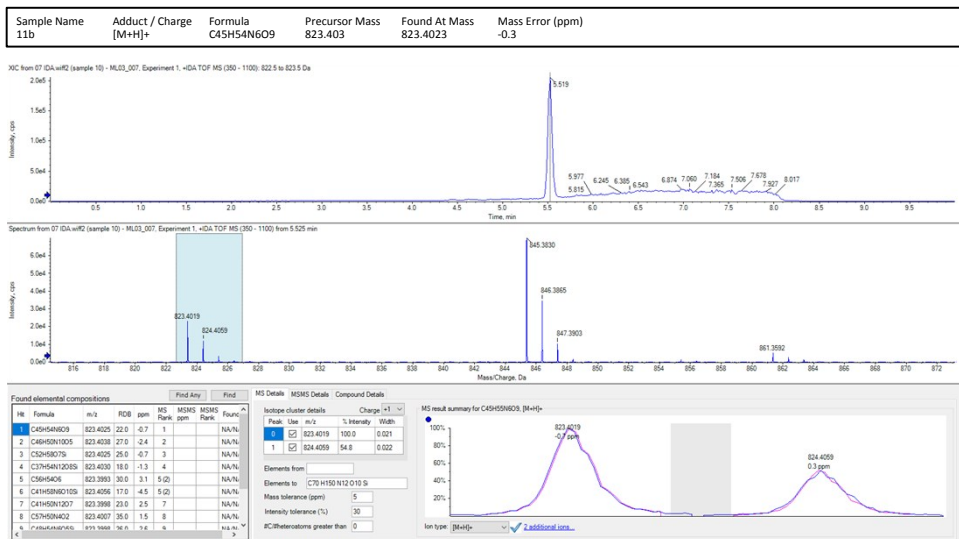

#### 4. Titration Table for Figure 4

##### 10a

| % DMSO | 1-Nor | 2-Tyr | 3-Gly | NH2  | NHBoc |
|--------|-------|-------|-------|------|-------|
| 0      | 7.05  | 6.91  | 7.56  | 7.31 | 5.45  |
| 2      | 7.03  | 6.92  | 7.58  | 7.32 | 5.64  |
| 4      | 7.00  | 6.96  | 7.68  | 7.32 | 5.76  |
| 6      | 6.95  | 6.99  | 7.66  | 7.32 | 5.85  |
| 8      | 6.90  | 7.00  | 7.63  | 7.34 | 5.91  |
| 10     | 6.86  | 6.98  | 7.59  | 7.31 | 5.95  |
| 20     | 6.75  | 6.98  | 7.38  | 7.29 | 6.04  |
| 30     | 6.89  | 7.03  | 7.21  | 7.27 | 6.05  |
| 40     | 6.87  | 6.94  | 7.09  | 7.21 | 6.08  |
| 60     | 6.68  | 6.85  | 6.94  | 7.13 | 6.10  |
| 80     | 6.62  | 6.79  | 6.85  | 7.02 | 6.10  |
|        | ppm   | ppm   | ppm   | ppm  | ppm   |

##### 10b

| % DMSO | 1-Nor | 2-Tyr | 3-Gly | NH2  | NHBoc |
|--------|-------|-------|-------|------|-------|
| 0      | 7.26  | 7.15  | 7.71  | 7.29 | 5.68  |
| 2      | 7.15  | 7.25  | 7.84  | 7.27 | 5.72  |
| 4      | 7.10  | 7.30  | 7.86  | 7.24 | 5.78  |
| 6      | 7.08  | 7.32  | 7.84  | 7.19 | 5.82  |
| 8      | 7.03  | 7.33  | 7.80  | 7.14 | 5.87  |
| 10     | 6.99  | 7.33  | 7.75  | 7.09 | 5.91  |
| 20     | 6.95  | 7.33  | 7.54  | 6.94 | 6.00  |
| 30     | 6.92  | 7.34  | 7.39  | 6.80 | 6.02  |
| 40     | 6.86  | 7.34  | 7.30  | 6.74 | 6.02  |
| 60     | 6.79  | 7.22  | 7.18  | 6.53 | 5.97  |
| 80     | 6.76  | 7.19  | 7.10  | 6.47 | 5.96  |
|        | ppm   | ppm   | ppm   | ppm  | ppm   |



**11a**

| % DMSO | 1-Nor | 2-Tyr | 3-Gly | NH2  | NHBoc |
|--------|-------|-------|-------|------|-------|
| 0      | 6.97  | 6.71  | 7.61  | 7.17 | 5.45  |
| 2      | 6.97  | 6.78  | 7.65  | 7.00 | 5.69  |
| 4      | 6.95  | 6.80  | 7.58  | 7.07 | 5.79  |
| 6      | 6.92  | 6.81  | 7.64  | 7.09 | 5.86  |
| 10     | 6.87  | 6.82  | 7.68  | 7.11 | 5.95  |
| 20     | 6.73  | 6.82  | 7.61  | 7.07 | 6.01  |
| 30     | 6.64  | 6.81  | 7.46  | 7.02 | 6.01  |
| 40     | 6.60  | 6.83  | 7.34  | 6.99 | 5.99  |
| 60     | 6.56  | 6.83  | 7.14  | 6.97 | 5.94  |
| 80     | 6.55  | 6.85  | 7.03  | 6.87 | 5.92  |
|        | ppm   | ppm   | ppm   | ppm  | ppm   |

**11b**

| % DMSO | 1-Nor | 2-Tyr | 3-Gly | NH2  | NHBoc |
|--------|-------|-------|-------|------|-------|
| 0      | 7.29  | 7.20  | 7.76  | 7.44 | 5.52  |
| 2      | 7.23  | 7.27  | 7.80  | 7.42 | 5.61  |
| 4      | 7.21  | 7.29  | 7.81  | 7.39 | 5.66  |
| 6      | 7.18  | 7.31  | 7.80  | 7.35 | 5.74  |
| 8      | 7.14  | 7.33  | 7.78  | 7.31 | 5.81  |
| 10     | 7.10  | 7.34  | 7.74  | 7.27 | 5.86  |
| 20     | 6.90  | 7.35  | 7.54  | 7.25 | 5.99  |
| 30     | 6.77  | 7.31  | 7.35  | 7.16 | 6.01  |
| 40     | 6.68  | 7.30  | 7.30  | 7.01 | 5.99  |
| 60     | 6.61  | 7.22  | 7.07  | 6.95 | 5.97  |
| 80     | 6.58  | 7.09  | 6.99  | 6.99 | 5.96  |
|        | ppm   | ppm   | ppm   | ppm  | ppm   |
